# Supplementary material for: An Exploratory Critical Review on TNF-α as a Potential Inflammatory Biomarker Responsive to Dietary Intervention with Bioactive Foods and Derived Products
Source: MDPI journal article supplement (doi:10.3390/foods11162524), 2022-08-21
Supplement: s1 [file s1]

**Table S1.-** Reported differences in the circulatory levels of TNF- $\alpha$  between lean, overweight and obese individuals.

| Ref. | Sample population |                                                                                                                                                  | TNF- $\alpha$ levels     |                                                                                                                                                                                                       |                          |                                                                                             |                                                                                              |
|------|-------------------|--------------------------------------------------------------------------------------------------------------------------------------------------|--------------------------|-------------------------------------------------------------------------------------------------------------------------------------------------------------------------------------------------------|--------------------------|---------------------------------------------------------------------------------------------|----------------------------------------------------------------------------------------------|
|      | Country<br>Sex    | Body weight phenotype + co-morbidities group, Age <sup>a</sup> (y)                                                                               | Type of sample<br>Method | Results per group <sup>a</sup> (N) <sup>b</sup>                                                                                                                                                       | CV% <sup>c</sup>         | (Sig)<br>Effect<br>(% change <i>vs.</i><br>Lean)                                            | General message conveyed by the article                                                      |
| [21] | Sweden<br>Women   | Lean, 34.4 $\pm$ 1.2<br>Obese, 34.4 $\pm$ 1.2                                                                                                    | Plasma,<br>ELISA         | Protein levels (pg/mL)<br>Lean (2): 1.9 $\pm$ 0.4<br>Obese (2): 3.2 $\pm$ 2.8                                                                                                                         | 22%<br>88%               | (NS)<br>$\uparrow$ (+68%)                                                                   | Obesity correlates with increased plasma TNF- $\alpha$ levels. (N = only 2 values).          |
| [22] | Spain<br>Women    | Lean, 38.4 $\pm$ 2.3<br>Obese, 46.3 $\pm$ 1.3<br>Obese + T2DM, 51.6 $\pm$ 2.6<br>Very obese, 41.5 $\pm$ 2.2<br>Very obese + T2DM, 46.3 $\pm$ 1.8 | Plasma,<br>ELISA         | Protein levels (pg/mL)<br>Lean (24): 5.7 $\pm$ 9.8<br>Obese (63): 11.6 $\pm$ 19.0<br>Obese + T2DM (19): 15.3 $\pm$ 17.4<br>Very obese (29): 8.6 $\pm$ 12.4<br>Very obese + T2DM (22): 12.0 $\pm$ 15.0 | >100%                    | (NS)<br>$\uparrow$ (+104%)<br>$\uparrow$ (+168%)<br>$\uparrow$ (+51%)<br>$\uparrow$ (+111%) | Increased levels of TNF- $\alpha$ with BMI. Very high variability in the results.            |
| [23] | Poland<br>Women   | Lean, 29.4 $\pm$ 9.4<br>Overweight, 32.9 $\pm$ 11.3<br>Obese, 40.7 $\pm$ 11.0<br>Very obese, 40.9 $\pm$ 10.4                                     | Serum,<br>ELISA          | Protein levels (pg/mL)<br>Lean (28): 2.9 $\pm$ 2.2<br>Overweight (24): 6.5 $\pm$ 3.1<br>Obese (81): 6.8 $\pm$ 3.1<br>Very obese (21): 7.4 $\pm$ 2.6                                                   | 35%<br>46%<br>48%<br>76% | ( $p$ <0.001)<br>$\uparrow$ (+124%)<br>$\uparrow$ (+135%)<br>$\uparrow$ (+155%)             | Obesity associates with increased serum TNF- $\alpha$ levels.                                |
| [24] | Israel<br>Mixed   | Non-obese, 41.9 $\pm$ 7.6<br>Obese, 43.1 $\pm$ 12.3                                                                                              | Serum,<br>ELISA          | Protein levels (pg/mL)<br>Non-obese (9), 0.3 $\pm$ 0.3<br>Obese (41), 1.0 $\pm$ 0.8                                                                                                                   | 100%<br>80%              | ( $p$ <0.001)<br>$\uparrow$ (+233%)                                                         | Obesity associates with increased serum TNF- $\alpha$ levels.                                |
| [25] | Korea<br>Mixed    | Non obese, 15.4 $\pm$ 0.5<br>Obese, 15.3 $\pm$ 0.5                                                                                               | Serum,<br>ELISA          | Protein levels (pg/mL)<br>Non-obese (32), 5.9 $\pm$ 2.0<br>Obese (39), 18.2 $\pm$ 6.7                                                                                                                 | 33%<br>37%               | ( $p$ <0.001)<br>$\uparrow$ (+208%)                                                         | Obesity associates with increased serum TNF- $\alpha$ levels.                                |
| [26] | USA<br>Women      | Lean, 36.9 $\pm$ 11.8<br>Obese, 43.2 $\pm$ 8.6                                                                                                   | Plasma,<br>ELISA         | Protein levels (pg/mL)<br>Lean (16), 2.7 $\pm$ 0.9<br>Obese (16), 3.6 $\pm$ 1.8                                                                                                                       | 34%<br>50%               | ( $p$ <0.05)<br>$\uparrow$ (+33%)                                                           | Obesity associates with increased serum TNF- $\alpha$ levels.                                |
| [27] | USA<br>Mixed      | Lean, 42.2 $\pm$ 0.2<br>Obese, 45.2 $\pm$ 0.2                                                                                                    | Plasma,<br>ELISA         | Protein levels (pg/mL)<br>Lean (84), 3.8 $\pm$ 1.6<br>Obese (84), 4.3 $\pm$ 1.6                                                                                                                       | 42%<br>36%               | ( $p$ <0.05)<br>$\uparrow$ (+13%)                                                           | Obesity associates with increased serum TNF- $\alpha$ levels.                                |
| [28] | USA<br>Mixed      | Lean, 11.9 $\pm$ 4.0<br>Obese, 11.6 $\pm$ 3.4                                                                                                    | Serum,<br>ELISA          | Protein levels (pg/mL)<br>Lean (6), 3.1 $\pm$ 1.8<br>Obese (21), 4.2 $\pm$ 2.0                                                                                                                        | 58%<br>48%               | (NS)<br>$\uparrow$ (+35%)                                                                   | Serum TNF- $\alpha$ levels is higher in obese but the differences didn't reach significance. |

|      |                          |                                                                                                                    |                  |                                                                                                                                                                              |                                  |                                                          |                                                                                                                                          |
|------|--------------------------|--------------------------------------------------------------------------------------------------------------------|------------------|------------------------------------------------------------------------------------------------------------------------------------------------------------------------------|----------------------------------|----------------------------------------------------------|------------------------------------------------------------------------------------------------------------------------------------------|
| [29] | Netherlands<br>Mixed     | Lean, 38.3 ± 2.1<br>Obese, 37.4 ± 1.2                                                                              | Plasma,<br>ELISA | Protein levels (ng/L = pg/mL)<br>Lean (13), 3.4 ± 0.4<br>Obese (15), 4.5 ± 0.5                                                                                               | 12%<br>11%                       | (NS)<br>↑ (+32%)                                         | Serum TNF-α levels is higher in obese but the differences didn't reach significance.                                                     |
| [30] | Poland<br>Women          | Lean, 32.6 ± 8.6<br>Obese, 30.1 ± 5.5                                                                              | Serum,<br>ELISA  | Protein levels (pg/mL)<br>Lean (15), 4.5 ± 2.3<br>Obese (26), 8.8 ± 7.0                                                                                                      | 50%<br>80%                       | (p<0.05)<br>↑ (+96%)                                     | Obesity associates with increased serum TNF-α levels.                                                                                    |
| [31] | USA<br>Women             | Lean, 31.9 ± 5.8<br>Obese, 35.7 ± 4.1<br>Obese + PCOS, 29.6 ± 5.8                                                  | Plasma,<br>ELISA | Protein levels (pg/mL)<br>Lean (15), 3.1 ± 0.7<br>Obese (17), 3.8 ± 0.8<br>Obese + PCOS (42), 4.1 ± 1.9                                                                      | 22%<br>21%<br>47%                | (NS)<br>↑ (+23%)<br>↑ (+32%)                             | Plasma TNF-α levels are higher in obese but the differences didn't reach significance.                                                   |
| [32] | USA<br>Mixed             | Lean, 35.0<br>Obese, 46.0                                                                                          | Serum,<br>ELISA  | Protein levels (pg/mL)<br>Lean (10), 82.3 ± 89<br>Obese (9), 0.8 ± 7.2                                                                                                       | >100%<br>>100%                   | (p=0.015)<br>↓ (-99%)                                    | This study indicates opposite results to all the other ones.<br>Very high variability in the data, especially in the obese participants. |
| [33] | New Zealand<br>Women     | Lean, 53 ± 10<br>Obese, 54 ± 9                                                                                     | Plasma<br>ELISA  | Protein levels (ng/L = pg/mL)<br>Lean (14), 0.8 ± 0.4<br>Obese (15), 1.6 ± 1.0                                                                                               | 50%<br>62.5%                     | (p=0.046)<br>↑ (+100%)                                   | Obese women had higher levels of TNF-α.                                                                                                  |
| [34] | USA<br>Mixed             | Lean, 40.0 ± 14.9<br>Obese + T2DM, 50 ± 10.8                                                                       | Plasma,<br>ELISA | Protein levels (pg/mL)<br>Lean (14), 2.8 ± 0.5<br>Obese + T2DM (13), 4.3 ± 2.7                                                                                               | 17%<br>64%                       | (p<0.05)<br>↑ (+53%)                                     | Obesity associates with increased serum TNF-α levels.                                                                                    |
| [35] | Czech Republic,<br>Women | Lean, 37.7 ± 2.8<br>Obese, 39.4 ± 9.5                                                                              | Plasma,<br>ELISA | Protein levels (pg/mL)<br>Lean (12), 0.6 ± 0.3<br>Obese (20), 0.7 ± 0.2                                                                                                      | 50%<br>29%                       | (p<0.05)<br>↑ (+16%)                                     | Obesity associates with increased serum TNF-α levels. Data estimated from figures.                                                       |
| [36] | Canada<br>Men            | Lean, 42.0 ± 10.7<br>Obese, 46.2 ± 7.1<br>Very obese, 43.0 ± 6.9                                                   | Plasma<br>ELISA  | Protein levels (pg/mL)<br>Lean (59), 1.0 ± 1.1<br>Obese, (101), 1.1 ± 1.1<br>Very obese (57), 1.3 ± 1.1                                                                      | >100%<br>92%<br>90%              | (p<0.05)<br>↑ (+19%)<br>↑ (+30%)                         | TNF-α levels increased with BMI.                                                                                                         |
| [37] | USA<br>NR                | Lean, 43 ± 14.4<br>Overweight, 49 ± 12.6<br>Obese, 45 ± 20.8<br>Very obese, 42 ± 12.7<br>Morbidly obese, 41 ± 19.3 | Plasma,<br>ELISA | Protein levels (pg/mL)<br>Lean (13), 39.0 ± 50.5<br>Overweight (10), NR<br>Obese (12), 294.0 ± 142.0<br>Very obese (18), 478.0 ± 233.3<br>Morbidly obese (15), 713.0 ± 240.1 | >100%<br>ND<br>48%<br>49%<br>34% | (p<0.001)<br>ND<br>↑ (+653%)<br>↑ (+1125%)<br>↑ (+1728%) | TNF-α positively correlates with BMI.                                                                                                    |
| [38] | Poland<br>Women          | Lean, 36.4 ± 8.0<br>Overweight, 33.3 ± 12.0                                                                        | Plasma,<br>ELISA | Protein levels (pg/mL)<br>Lean (14), 3.1 ± 3.0                                                                                                                               | 97%                              | (p<0.001)                                                | TNF-α positively correlates with BMI.                                                                                                    |

|      |                    |                                                                                                                                                                                                                                               |                                  |                                                                                                                                                                                                                                                                                                    |                                                          |                                                                                                      |                                                                                                        |
|------|--------------------|-----------------------------------------------------------------------------------------------------------------------------------------------------------------------------------------------------------------------------------------------|----------------------------------|----------------------------------------------------------------------------------------------------------------------------------------------------------------------------------------------------------------------------------------------------------------------------------------------------|----------------------------------------------------------|------------------------------------------------------------------------------------------------------|--------------------------------------------------------------------------------------------------------|
|      |                    | Obese, 43.8 ± 10.8                                                                                                                                                                                                                            |                                  | Overweight (12), 6.3 ± 3.0<br>Obese (57), 6.9 ± 2.9                                                                                                                                                                                                                                                | 48%<br>42%                                               | ↑ (+103%)<br>↑ (+123%)                                                                               |                                                                                                        |
| [39] | Poland<br>Women    | Lean, 38.0 ± 8.0<br>Obese, 52.0 ± 9.0<br>Obese + MetS, 53.0 ± 9.0                                                                                                                                                                             | Plasma<br>ELISA                  | Protein levels (pg/mL)<br>Lean (14), 5.6 ± 2.0<br>Obese (21), 6.4 ± 5.5<br>Obese (71) + MetS, 6.3 ± 1.9                                                                                                                                                                                            | 38%<br>86%<br>30%                                        | (NS)<br>↑ (+14%)<br>↑ (+13%)                                                                         | Obesity and MetS do not significantly associate with an increase in serum TNF-α levels.                |
| [40] | Egypt<br>Mixed     | Men<br>Lean, 32.4 ± 2.89<br>Class I obese, 33.1 ± 3.13<br>Class II obese, 32.5 ± 3.14<br>Class III obese, 32.9 ± 3.06<br>Women<br>Lean, 31.6 ± 3.15<br>Class I obese, 31.9 ± 3.0<br>Class II obese, 32.3 ± 3.4<br>Class III obese, 32.1 ± 3.1 | Serum,<br>ELISA                  | Protein levels (pg/mL)<br>Men<br>Lean (15), 3.0 ± 0.7<br>Class I obese (15), 6.7 ± 1.5<br>Class II obese (15), 7.3 ± 1.9<br>Class III obese (15), 9.3 ± 2.0<br>Women<br>Lean (15), 2.8 ± 0.7<br>Class I obese (15), 4.8 ± 1.3<br>Class II obese (15), 5.1 ± 2.0<br>Class III obese (15), 7.3 ± 2.1 | 23%<br>22%<br>26%<br>21%<br><br>15%<br>27%<br>39%<br>29% | (p<0.05)<br>↑ (+123%)<br>↑ (+143%)<br>↑ (+210%)<br><br>(p<0.05)<br>↑ (+71%)<br>↑ (+82%)<br>↑ (+161%) | TNF-α positively correlates with BMI. Slightly higher TNF-α levels were detected in men than in women. |
| [41] | Brazil<br>Mixed    | T2DM, 56.0 (12.0)<br>Non diabetes, 53.0 (18.0)<br>Lean<br>Lean + T2DM<br>Overweight<br>Overweight + T2DM<br>Obese<br>Obese + T2DM                                                                                                             | Plasma<br>Cytometry Bed<br>Array | Protein levels (pg/mL)<br>T2DM (102), Non diabetes (62)<br>Lean: 0.090 (0.075)<br>Lean + T2DM: 0.086 (0.048)<br>Overweight: 0.086 (0.068)<br>Overweight + T2DM: 0.092 (0.048)<br>Obese: 0.112 (0.058)<br>Obese + T2DM: 0.092 (0.042)                                                               | ND                                                       | (NS)<br>↓ (-4%)<br>↓ (-4%)<br>↑ (+2%)<br>↑ (+24%)<br>↑ (+2%)                                         | Results converted from fg/mL to pg/mL. Very low values compared to other reports.                      |
| [42] | Pakistan<br>Mixed  | Lean, 46.5 ± 8.2<br>Overweight + MetS, 47.08 ± 8.0                                                                                                                                                                                            | Serum<br>ELISA                   | Protein levels (pg/mL)<br>Lean (200): 9.5 (6.1 – 18.0)<br>Overweight + MetS: 20.5 (10.0 – 62.0)                                                                                                                                                                                                    | ND                                                       | (p<0.0001)<br>↑ (+115%)                                                                              | Increased levels of TNF-α with increased BMI.                                                          |
| [43] | Australia<br>Mixed | Lean, 33.0 ± 3.2<br>Overweight, 44.9 ± 4.2<br>Obese, 43.3 ± 4.5                                                                                                                                                                               | Serum<br>ELISA                   | Protein levels (pg/mL)<br>Lean (12): 3.6 ± 1.2<br>Overweight (9): 3.1 ± 3.9<br>Obese (8): 4.2 ± 2.3                                                                                                                                                                                                | 33%<br>>100%<br>55%                                      | (NS)<br>↓ (-14%)<br>↑ (17%)                                                                          | No significant differences between phenotypes. Results estimated from figure.                          |
| [44] | Spain<br>Mixed     | Lean, 65.6 ± 0.7<br>Overweight, 64.9 ± 0.7<br>Obese, 64.0 ± 0.6                                                                                                                                                                               | Plasma<br>ELISA                  | Protein levels (pg/mL)<br>Lean (50): 25.0 ± 11.0<br>Overweight (50): 30.0 ± 11.0<br>Obese (50): 34.0 ± 14.0                                                                                                                                                                                        | 41%<br>37%<br>44%                                        | (NS)<br>↑ (+20%)<br>(p<0.001)<br>↑ (+36%)                                                            | TNF-α increased with BMI. Results estimated from figure.                                               |

|      |               |                                                                             |                 |                                                                                                    |                   |                        |                                                                                |
|------|---------------|-----------------------------------------------------------------------------|-----------------|----------------------------------------------------------------------------------------------------|-------------------|------------------------|--------------------------------------------------------------------------------|
|      |               |                                                                             |                 |                                                                                                    |                   |                        |                                                                                |
| [45] | Poland<br>Men | Lean, 21.4 ± 1.2<br>Class I obese, 31.1 ± 3.8<br>Class II obese, 28.4 ± 3.6 | Serum,<br>ELISA | Protein levels (pg/mL)<br>Lean (9): 3.5 ± 1.7<br>Obese (I) (9): 3.5 ± 0.9<br>Obese (II): 5.2 ± 1.3 | 49%<br>26%<br>25% | (NS)<br>NC<br>↑ (+49%) | Data estimated from bar figure. No significant differences between the groups. |

**Legend:** <sup>a</sup>: Most values presented as the mean ± standard deviation (SD), some data indicated as Median (Inter Quartile Range, IQR); <sup>b</sup>: (N): sample size per group; <sup>c</sup>: CV%: Coefficient of variation in percentage estimated for each subgroup ((CV%) = (Standard Deviation/Mean) × 100); BMI: Body mass index; MetS: Metabolic syndrome; NC: No change; ND: Not determined; NR: Not reported; NS: Not significant; PCOS: Polycystic Ovary Syndrome; T2DMM: Type 2 diabetes mellitus; TNF-α: Tumour necrosis factor alpha.

**Table S2.-** Reported changes in the circulatory levels of human TNF- $\alpha$  following dietary intervention with PUFAs-containing foods and products.

|                                                        | Intervention                                                                                                                                    | Sample population          |                                                                             | TNF- $\alpha$ levels  |                                                                                                                                                                                                                                                     |                                                    |                                                                                                    |                                                                                                                                |
|--------------------------------------------------------|-------------------------------------------------------------------------------------------------------------------------------------------------|----------------------------|-----------------------------------------------------------------------------|-----------------------|-----------------------------------------------------------------------------------------------------------------------------------------------------------------------------------------------------------------------------------------------------|----------------------------------------------------|----------------------------------------------------------------------------------------------------|--------------------------------------------------------------------------------------------------------------------------------|
| Ref.                                                   | Tested product/main compounds<br><br>Study design                                                                                               | Country<br><br>Sex         | Body weight phenotype and comorbidities groups,<br><br>Age <sup>a</sup> (y) | Type of Sample Method | Results per group <sup>a</sup> (N) <sup>b</sup>                                                                                                                                                                                                     | CV% <sup>c</sup><br><br>per group                  | Sig<br><br>Effect<br><br>(%A <i>vs</i> B per group <sup>d</sup> ;<br><br>T – C <sup>e</sup> pg/mL) | General messages conveyed by the article                                                                                       |
| PUFAs ( $\omega$ -3 PUFAs: EPA, DHA in capsules, oils) |                                                                                                                                                 |                            |                                                                             |                       |                                                                                                                                                                                                                                                     |                                                    |                                                                                                    |                                                                                                                                |
| [63]                                                   | T: $\omega$ -3 PUFAs (1110 mg/d: 600 mg/d EPA and 510 mg/d DHA)<br><br>C: PLA (sunflower oil)<br><br>RCT (crossover), 42 d (14 d washout phase) | The Netherlands<br><br>Men | Obese healthy<br><br>59.0 $\pm$ 9.0                                         | Plasma<br><br>ELISA   | Protein levels (pg/mL)<br><br>T: $\omega$ -3 PUFAs (11)<br><br>0 h: 1.09 $\pm$ 0.54;<br>2 h: 1.39 $\pm$ 0.78;<br>4 h: 1.10 $\pm$ 0.65<br><br>C: PLA (11)<br><br>0 h: 1.11 $\pm$ 0.64;<br>2 h: 1.31 $\pm$ 0.57;<br>4 h: 1.37 $\pm$ 0.68<br><br>T - C | <br><br>49%<br>56%<br>59%<br><br>57%<br>43%<br>49% | <br><br>(NS)<br>+28%<br>+1%<br><br>(NS)<br>+18%<br>+23%<br><br>-0.02 pg/mL (NS)                    | No significant differences in the levels of TNF- $\alpha$ between T and C at any time point.<br><br>No effects on body weight. |

|      |                                                                                                                                                                                      |                     |                                                                  |                     |                                                                                                                                                  |                            |                                                                                                       |                                                                                                                                                                                                                      |
|------|--------------------------------------------------------------------------------------------------------------------------------------------------------------------------------------|---------------------|------------------------------------------------------------------|---------------------|--------------------------------------------------------------------------------------------------------------------------------------------------|----------------------------|-------------------------------------------------------------------------------------------------------|----------------------------------------------------------------------------------------------------------------------------------------------------------------------------------------------------------------------|
| [64] | T: $\omega$ -3 PUFAs (1200 mg/d: 930 mg EPA, 290 mg DHA, 100 mg GLA, 18 mg Vitamin E/d)<br><br>C: PLA (medium-chain triglycerides)<br><br>RCT (crossover), 90 d (21 d washout phase) | USA<br><br>Mixed    | Obese<br><br>15.7 $\pm$ 1.0                                      | Serum<br><br>ELISA  | Protein levels (pg/mL)<br><br>T: $\omega$ -3 PUFAs (25)<br>B: NR; A: 5.20 $\pm$ 1.0<br><br>C: PLA (25)<br>B: NR; A: 5.70 $\pm$ 1.50<br><br>T – C | ND; 19%<br><br><br>ND; 26% | ND<br><br><br>ND<br><br><br>-0.50 pg/mL<br>( $p=0.008$ , based only on values after (A) intervention) | Significant but small reduction of the levels of TNF- $\alpha$ with T.<br><br>No effect on body weight                                                                                                               |
| [65] | T: Fish oil (900 mg/d: 360 mg DHA and 540 mg EPA)<br><br>C: PLA (corn starch)<br><br>RCT (parallel), 30 d                                                                            | Mexico<br><br>Mixed | Overweight, IR<br><br>T: 13.6 $\pm$ 1.9<br><br>C: 12.9 $\pm$ 2.0 | Serum<br><br>ELISA  | Protein levels (pg/mL)<br><br>T: Fish oil (49)<br>B: 11.35 $\pm$ 4.23; A: NR<br><br>C: PLA (27)<br>B: 10.13 $\pm$ 4.98; A: NR<br><br>T – C       | 37%; ND<br><br><br>49%; ND | ND<br><br><br>ND<br><br><br>NR ( $p=0.052$ )                                                          | Significant reduction of the levels of TNF- $\alpha$ but values not clearly indicated. No information on data after intervention.<br><br>Effect on body weight only in some children. Some numeric data are missing. |
| [66] | T: Fish oil (4000 mg/d: 1860 mg EPA and 1500 mg DHA)                                                                                                                                 | USA<br><br>Mixed    | Obese, IR nondiabetic<br><br>T: 48.8 $\pm$ 2.3                   | Plasma<br><br>ELISA | Protein levels (pg/mL)                                                                                                                           |                            |                                                                                                       | No significant effects on the levels of TNF- $\alpha$ .                                                                                                                                                              |

|                        |                                                                                                                                                   |                    |                                                  |                     |                                                                                                                                                   |                          |                                                               |                                                                                                                                                      |
|------------------------|---------------------------------------------------------------------------------------------------------------------------------------------------|--------------------|--------------------------------------------------|---------------------|---------------------------------------------------------------------------------------------------------------------------------------------------|--------------------------|---------------------------------------------------------------|------------------------------------------------------------------------------------------------------------------------------------------------------|
|                        | C: PLA (corn oil)<br>RCT (parallel), 84 d                                                                                                         |                    | C: 53.3 ± 2.2                                    |                     | T: Fish oil (19)<br>B: 17.6 ± 2.9; A: 22.3 ± 3.4<br><br>C: PLA (14)<br>B: 25.8 ± 4.2; A: 19.6 ± 2.6<br><br>T – C                                  | 16%; 15%<br><br>16%; 13% | (NS)<br>+26.7%<br><br>(NS)<br>-24.03%<br><br>+10.9 pg/mL (NS) | No effects on body weight.                                                                                                                           |
| [67]                   | T: DHA (500 mg/d during the first 60 d and 250 mg/d till the end of the study) + VLCK diet<br><br>C: PLA + VLCK diet<br><br>RCT (parallel), 180 d | Spain<br><br>Mixed | Obese<br><br>T: 47.4 ± 9.1<br><br>C: 44.3 ± 11.7 | Serum<br><br>ELISA  | Protein levels (pg/mL)<br><br>T: VLCK diet (14)<br>B: 5.0 ± 2.5; A: 2.0 ± 0.3<br><br>C: VLCK diet (15)<br>B: 4.7 ± 2.3; A: 2.0 ± 0.4<br><br>T – C | 50%; 15%<br><br>49%; 20% | (NS)<br>-60%<br><br>(NS)<br>-57%<br><br>-0.3 pg/mL (NS)       | No significant effects on the levels of TNF-α. Poor indication of TNF-α units.<br><br>No significant differences in body weight loss between groups. |
| PUFAs-containing foods |                                                                                                                                                   |                    |                                                  |                     |                                                                                                                                                   |                          |                                                               |                                                                                                                                                      |
| [68]                   | T: chia seeds (50 g/d)<br>C: PLA<br><br>RCT (parallel), 84 d                                                                                      | USA<br><br>Mixed   | Overweight/obese<br><br>20 - 70                  | Plasma<br><br>ELISA | Protein levels (pg/mL)<br><br><i>Men</i><br><br>T: Chia seeds (14)<br>B: 1.63 ± 1.12; A: 1.52 ± 1.01                                              | 69%; 66%                 | (NS)<br>-7%                                                   | No effects on the levels of TNF-α.<br><br>No effect on body weight.                                                                                  |

|      |                                                                                   |           |                                               |                 |                                                                                                                                                                                                                                   |                                                      |                                                                                                   |                                                                                          |
|------|-----------------------------------------------------------------------------------|-----------|-----------------------------------------------|-----------------|-----------------------------------------------------------------------------------------------------------------------------------------------------------------------------------------------------------------------------------|------------------------------------------------------|---------------------------------------------------------------------------------------------------|------------------------------------------------------------------------------------------|
|      |                                                                                   |           |                                               |                 | C: PLA (14)<br>B: $1.59 \pm 1.12$ ; A: $1.39 \pm 0.52$<br><br>T - C<br><br><i>Women</i><br>T: Chia seeds (25)<br>B: $1.48 \pm 1.25$ ; A: $1.6 \pm 1.25$<br><br>C: PLA (23)<br>B: $1.4 \pm 0.96$ ; A: $1.41 \pm 0.76$<br><br>T - C | 70%; 37%<br><br><br><br><br>85%; 78%<br><br>69%; 54% | (NS)<br>-12%<br><br>+0.11 pg/mL (NS)<br><br>(NS)<br>+8%<br><br>(NS)<br>0%<br><br>+0.11 pg/mL (NS) |                                                                                          |
| [69] | T: Flaxseeds (40 g/d)<br>C: PLA<br>RCT (crossover), 84 d<br>(28 d, washout phase) | USA<br>NR | Obese, glucose intolerant<br>$54.7 \pm 6.6$ . | Plasma<br>ELISA | Protein levels (pg/mL)<br><br>T: Flaxseeds (7)<br>B: $0.9 \pm 0.4$ ; A: $0.8 \pm 0.5$<br><br>C: PLA (7)<br>B: $0.6 \pm 0.5$ ; A: $0.7 \pm 0.6$<br><br>T - C                                                                       | 44% 62%<br><br>83% 86%                               | (NS)<br>-11%<br><br>(NS)<br>+13%<br><br>-0.2 pg/mL (NS)                                           | No significant effect on the levels of TNF- $\alpha$ .<br><br>No effects on body weight. |



|      |                                                                                                   |                 |                                         |                     |                                                                                                                                                                     |                          |                                                                                  |                                                                                                 |
|------|---------------------------------------------------------------------------------------------------|-----------------|-----------------------------------------|---------------------|---------------------------------------------------------------------------------------------------------------------------------------------------------------------|--------------------------|----------------------------------------------------------------------------------|-------------------------------------------------------------------------------------------------|
| [70] | T: <i>Nigella sativa</i> oil<br>(3 g/d) + LCD,<br>C: PLA + LCD<br>RCT (parallel), 56 d            | Iran<br>Women   | Obese,<br>T: 41 ± 11.8<br>C: 39.5 ± 9.8 | Serum<br>ELISA      | Protein levels (pg/mL)<br><br>T: <i>Nigella sativa</i> oil (45)<br>B: 24.0 ± 17.3; A: 14.2 ± 10.9<br><br>C: PLA (45)<br>B: 21.7 ± 15.2; A: 18.2 ± 13.5<br><br>T - C | 72%, 76%<br><br>70%, 74% | ( <i>p</i> <0.05)<br>-41%<br><br>(NS)<br>-16%<br><br>-6.3 pg/mL( <i>p</i> =0.03) | Significant reduction of<br>the levels of TNF-α with<br>T.<br><br>No effects on body<br>weight. |
| [71] | T: Baru almonds (20<br>g/d rich in MUFAs<br>51% and PUFAs 31%);<br>C: PLA<br>RCT (parallel), 56 d | Brazil<br>Women | Overweight/obese<br>40.0 ± 11.0         | Plasma<br>Milliplex | Protein levels (pg/mL)<br><br>T: Almonds (24)<br>B: 2.1 ± 0.1; A: 2.2 ± 0.1<br><br>C: PLA (22)<br>B: 2.6 ± 0.3; A: 2.0 ± 0.1<br><br>T - C                           | 5%; 5%<br><br>16%; 5%    | (NS)<br>+5%<br><br>(NS)<br>-23%<br><br>+0.7 pg/mL (NS)                           | No significant effects on<br>the levels of TNF-α.<br><br>No effects on body<br>weight.          |

**Legend:** <sup>a</sup>: Values are presented as the mean ± SD; <sup>b</sup>:(N): Sample size per group; <sup>c</sup>: CV%: Coefficient of variation in percentage estimated for each analyzed subgroup ((CV%) = (Standard Deviation/Mean) × 100); B: Before intervention; A: After intervention; <sup>d</sup>: Difference in % before and after intervention; T: Treatment; C: Control; T - C<sup>e</sup>: effect size calculated as the difference between the T and the C group (pg/mL); DHA: Docosahexaenoic acid; EPA: Eicosapentaenoic acid; GLA: Gamma-linolenic acid; IR: Insulin resistance; LCD: Low calorie diet; MUFAs: Monounsaturated fatty acids; ND: Not determined; NR: Not reported; NS: Not significant; PLA: Placebo; PUFAs: Polyunsaturated fatty acids; RCT: Randomized clinical trial; TNF-α: tumor necrosis factor alpha; VLCK: Very low-calorie ketogenic diet.

**Table S3.-** Reported changes in the circulatory levels of human TNF- $\alpha$  following dietary intervention with VitD supplements.

| Ref. | Intervention                                                                                                                          | Sample population    |                                                                            | TNF- $\alpha$ levels               |                                                                                                                                                                                                                                           |                                          |                                                                                               |                                                                                                                |
|------|---------------------------------------------------------------------------------------------------------------------------------------|----------------------|----------------------------------------------------------------------------|------------------------------------|-------------------------------------------------------------------------------------------------------------------------------------------------------------------------------------------------------------------------------------------|------------------------------------------|-----------------------------------------------------------------------------------------------|----------------------------------------------------------------------------------------------------------------|
|      | Tested product/main compounds<br><br>Study design                                                                                     | Country<br><br>Sex   | Body weight phenotype and comorbidities groups<br><br>Age <sup>a</sup> (y) | Type of Sample Method              | Results per group <sup>a</sup> (N) <sup>b</sup>                                                                                                                                                                                           | CV% <sup>c</sup> per group               | (Sig Effect<br><br>(% A <i>vs</i> B per group <sup>d</sup> ;<br><br>T – C <sup>e</sup> pg/mL) | General messages conveyed by the article                                                                       |
| [90] | T: Oily VitD preparation (3332 IU/d) + weight reduction program<br><br>C: PLA + weight reduction program<br><br>RCT (parallel), 365 d | Germany<br><br>Mixed | Overweight<br><br>T: 47.4 $\pm$ 10.0<br><br>C: 48.8 $\pm$ 10.0             | Serum<br><br>Automated immunoassay | Protein levels (pg/mL)<br><br>T: Vitamin D + weight reduction program (82)<br><br>B: 7.84 $\pm$ 3.15; A: 7.04 $\pm$ 2.25<br><br><br>C: PLA + weight reduction program (83)<br><br>B: 8.12 $\pm$ 3.43; A: 7.90 $\pm$ 2.80<br><br><br>T - C | 40%; 32%<br><br><br><br><br><br>42%; 35% | $p < 0.05$<br><br>-10%<br><br><br><br>(NS)<br><br>-2.7%<br><br><br>-0.58 pg/mL ( $p < 0.05$ ) | Significant but rather small reduction of the levels of TNF- $\alpha$ with T.<br><br>No effect on body weight. |
| [91] | T: VitD (4000 IU/d) + exercise training program<br><br>C: PLA + exercise training program;<br><br>RCR (parallel), 84 d                | USA<br><br>Mixed     | Overweight/obese<br><br>T: 26.2 $\pm$ 5.1<br><br>C: 26.0 $\pm$ 4.5         | Serum<br><br>ELISA                 | Protein levels (pg/mL)<br><br>T: Vitamin D + exercise (10)<br><br>B: 2.3 $\pm$ 1.1; A: 2.1 $\pm$ 1.2                                                                                                                                      | 48%; 57%                                 | NS<br><br>-8.7%                                                                               | No significant effect on the levels of TNF- $\alpha$ .<br><br>No effect on body weight.                        |

|      |                                                                 |                  |                                                                |                                         |                                                                                                                                                                                     |                          |                                                                                                         |                                                                                    |
|------|-----------------------------------------------------------------|------------------|----------------------------------------------------------------|-----------------------------------------|-------------------------------------------------------------------------------------------------------------------------------------------------------------------------------------|--------------------------|---------------------------------------------------------------------------------------------------------|------------------------------------------------------------------------------------|
|      |                                                                 |                  |                                                                |                                         | C: PLA + exercise (13)<br>B: $1.9 \pm 1.3$ ; A: $1.9 \pm 1.2$<br><br>T - C                                                                                                          | 68%; 63%<br><br>         | NS<br>-0%<br><br>-0.2 pg/mL (NS)                                                                        |                                                                                    |
|      |                                                                 |                  |                                                                | Supernatant of whole blood<br><br>ELISA | Protein levels (pg/mL)<br><br>T: Vitamin D + exercise (10)<br>B: $1.5 \pm 0.6$ ; A: $0.6 \pm 0.5$<br><br>C: PLA + exercise (13)<br>B: $1.6 \pm 0.9$ ; A: $0.6 \pm 0.5$<br><br>T - C | 40%; 83%<br><br>56%; 83% | <p><math>p &lt; 0.05</math></p> -60%<br><br><p><math>p &lt; 0.05</math></p> -62%<br><br>+0.1 pg/mL (NS) |                                                                                    |
| [92] | T: VitD (4000 IU/d)<br><br>C: PLA;<br><br>RCT (parallel), 183 d | USA<br><br>Mixed | Obese and IR<br><br>T: $14.6 \pm 2.3$<br><br>C: $13.9 \pm 2.4$ | Serum<br><br>ELISA                      | Protein levels (pg/mL)<br><br>T: Vitamin D (14)<br>B: $1.85 \pm 0.15$ ; A: $1.6 \pm 0.15$<br><br>C: PLA (15)<br>B: $1.7 \pm 0.15$ ; A: $1.4 \pm 0.1$<br><br>T - C                   | 8%; 9%<br><br>9%; 7%     | NS<br>-13%<br><br>NS<br>-17%<br><br>+ 0.05 pg/mL (NS)                                                   | No significant reduction in TNF- $\alpha$ levels.<br><br>No effect on body weight. |

|      |                                                                                                        |                    |                                                          |                |                                                                                                                                                                                   |                                          |                              |                                                                                                                         |
|------|--------------------------------------------------------------------------------------------------------|--------------------|----------------------------------------------------------|----------------|-----------------------------------------------------------------------------------------------------------------------------------------------------------------------------------|------------------------------------------|------------------------------|-------------------------------------------------------------------------------------------------------------------------|
| [93] | T: Alphacalcidol (1 µg/d 1- $\alpha$ hydroxy-Vitamin D3)<br>C: PLA<br>RCT (parallel), 56 d             | Iran<br>Mixed      | Obese<br>T: 39 ± 8.9<br>C: 41 ± 14.5                     | Serum<br>ELISA | Protein levels (pg/mL)<br><br>T: Alphacalcidol (40)<br>B: 9.83 ± 25.42; A: NR<br><br>C: PLA (54)<br>B: 6.65 ± 14.10; A: NR<br><br>T – C                                           | >100%; ND<br><br><br><br>-3.5 pg/mL (NS) | NS<br>-20%<br><br>NS<br>+25% | No significant effect on the levels of TNF- $\alpha$ . Results estimated from Figures.<br><br>No effect on body weight. |
| [94] | T: VitD (initial bolus dose of 100,000 IU/d followed by 4,000 IU/d)<br>C: PLA<br>RCT (parallel), 112 d | Australia<br>Mixed | Overweight/obese<br>T: 30.5 (25, 35)<br>C: 29.5 (25, 41) | Serum<br>ELISA | Protein levels (pg/mL)<br><br>T: Vitamin D (28)<br>B: 29.6 (14.6, 55.0);<br>A: 24.3 (11.1, 45.6)<br><br>C: PLA (26)<br>B: 27.6 (16.9, 72.9);<br>A: 21.5 (12.4, 47.4)<br><br>T – C | ND<br><br><br><br>ND                     | NS<br>-18%<br><br>NS<br>-22% | No significant effect on the levels of TNF- $\alpha$ .<br><br>No effect on body weight.                                 |

**Legend:** <sup>a</sup>: Values are generally presented as the mean  $\pm$  standard deviation (SD), some data indicated as Median (Inter Quartile Range, IQR); <sup>b</sup>:(N): Sample size per group; <sup>c</sup>: CV%: Coefficient of variation in percentage estimated for each analyzed subgroup ((CV%) = (Standard Deviation/Mean)  $\times$  100); B: Before intervention; A: After intervention; <sup>d</sup>:Difference in % before and after intervention; T: Treatment; C: Control; T – C<sup>e</sup>: effect size calculated as the difference between the T and the C group (pg/mL); IR: Insulin resistance; ND: Not determined; NR: Not reported; NS: Not significant; PLA: Placebo; RCT: Randomized clinical trial; TNF- $\alpha$ : tumor necrosis factor alpha; VitD: Vitamin D.

**Table S4.-** Reported changes in the circulatory levels of human TNF- $\alpha$  following dietary intervention with products containing mixed bioactive (micro)nutrients.

| Ref. | Intervention<br>Tested product/main compounds<br>Study design                                            | Sample population |                                                                              | TNF- $\alpha$ levels     |                                                                                                                                                                             |                          |                                                                                  |                                                                                                  |
|------|----------------------------------------------------------------------------------------------------------|-------------------|------------------------------------------------------------------------------|--------------------------|-----------------------------------------------------------------------------------------------------------------------------------------------------------------------------|--------------------------|----------------------------------------------------------------------------------|--------------------------------------------------------------------------------------------------|
|      |                                                                                                          | Country<br>Sex    | Body weight phenotype<br>and comorbidities<br>groups<br>Age <sup>a</sup> (y) | Type of Sample<br>Method | Results per group <sup>a</sup> (N) <sup>b</sup>                                                                                                                             | CV% <sup>c</sup>         | (Sig)<br>Effect<br>(% A vs B <sup>d</sup> per group<br>T - C <sup>e</sup> pg/mL) | General message conveyed by<br>the article                                                       |
| [95] | T: NuFit active blend (3 times/d, 2.25g leucine and 30 mg vitamin B6),<br>C: PLA<br>RCT (parallel), 28 d | USA<br>Mixed      | Overweight/obese<br>T: 33 $\pm$ 5.1<br>C: 25 $\pm$ 5.8                       | Plasma<br>ELISA          | Protein levels (pg/mL)<br><br>T: NuFit (10)<br>B: 408 $\pm$ 22; A: 334 $\pm$ 38<br><br>C: PLA (10)<br>B: 411 $\pm$ 40; A: 393 $\pm$ 29<br><br>T - C                         | 5%; 11%<br><br>10%; 7%   | (p<0.01)<br>-18%<br><br>(NS)<br>-4%<br><br>-56 pg/mL (NR)                        | Reduction in TNF- $\alpha$ levels.<br>No effects on body weight.                                 |
| [96] | T: L-arginine (9 g/d)<br>C: PLA<br>RCT (parallel), 90 d                                                  | Poland<br>Mixed   | Obese<br>T: 43.8 $\pm$ 8.2<br>C: 41.0 $\pm$ 8.8                              | Serum<br>ELISA           | Protein levels (pg/mL)<br><br>T: L-arginine (30)<br>B: 4.6 $\pm$ 2.0; A: 4.3 $\pm$ 1.8<br><br>C: PLA (30)<br>B: 4.6 $\pm$ 1.8; A: 4.5 $\pm$ 1.5<br><br>T - C                | 43%; 41%<br><br>39%; 33% | (NS)<br>-7%<br><br>(NS)<br>-2%<br><br>-0.2 pg/mL (NS)                            | Non-significant tendency to<br>decrease of TNF- $\alpha$ levels.<br>No effects on body weight.   |
| [97] | T: Black soy peptide (4.5 g/d)<br>C: PLA<br>RCT (parallel), 84 d                                         | Korea<br>Mixed    | Overweight/obese<br>T: 39 $\pm$ 10.3<br>C: 36.2 $\pm$ 8.1                    | Serum<br>ELISA           | Protein levels (pg/mL)<br><br>T: Black soy peptide (35)<br>B: 4.84 $\pm$ 0.67; A: 3.97 $\pm$ 0.65<br><br>C: PLA (29)<br>B: 5.97 $\pm$ 0.97; A: 4.49 $\pm$ 0.78<br><br>T - C | 14%; 16%<br><br>16%; 17% | (p= 0.017)<br>-18%<br><br>(NS)<br>-25%<br><br>+0.61 pg/mL (NR)                   | Reduction of TNF- $\alpha$ levels in<br>the T group.<br>Significant reduction of body<br>weight. |
| [98] | T: Zinc (30 mg/d)<br>C: PLA<br>RCT (parallel), 56 d                                                      | Korea<br>Women    | Obese<br>20.8 $\pm$ 2.2                                                      | Serum<br>ELISA           | Protein levels (pg/mL)<br><br>T: Zinc (20)<br>B: 16.1 $\pm$ 7.1; A: 13.9 $\pm$ 4.9<br><br>C: PLA (20)<br>B: 13.0 $\pm$ 5.0; A: 14.7 $\pm$ 4.7                               | 44%; 35%<br><br>38%; 32% | (NS)<br>-14%<br><br>(NS)<br>+13%                                                 | No reduction in TNF- $\alpha$ levels.<br>No effects on body weight.                              |

|       |                                                                                                                                            |                   |                                                       |                |                                                                                                                                                                                    |                          |                                                           |                                                                                                       |
|-------|--------------------------------------------------------------------------------------------------------------------------------------------|-------------------|-------------------------------------------------------|----------------|------------------------------------------------------------------------------------------------------------------------------------------------------------------------------------|--------------------------|-----------------------------------------------------------|-------------------------------------------------------------------------------------------------------|
|       |                                                                                                                                            |                   |                                                       |                | T - C                                                                                                                                                                              |                          | -3.9 pg/mL (NS)                                           |                                                                                                       |
| [99]  | T: Yeast $\beta$ -Glucan 1 capsule/d for the first 14 d followed by 2 capsule/d for the other 28 d (477 mg/capsule)<br>C: PLA<br>RCT, 42 d | Thailand<br>Mixed | Overweight/obese<br>41.3 $\pm$ 10.7                   | Serum<br>ELISA | Protein levels (pg/mL)<br><br>T: Yeast $\beta$ -Glucan 1 (22)<br>B: 10.5 $\pm$ 5; A: 10.2 $\pm$ 4<br><br>C: PLA (22)<br>B: 10.2 $\pm$ 3; A: 10.5 $\pm$ 1.5<br><br>T - C            | 47%; 40%<br><br>29%; 14% | (NS)<br>-3%<br><br>(NS)<br>+3%<br><br>-0.6 pg/mL (NS)     | Significant reduction of TNF- $\alpha$ levels (only after 14 d).<br>Reduction of waist circumference. |
| [100] | T: Hydrolyzed cod proteins (4 g/d)<br>C: PLA<br>RCT (parallel), 56 d                                                                       | Norway<br>Mixed   | Obese, MetS<br>T: 52.8 $\pm$ 6.2<br>C: 53.4 $\pm$ 6.8 | Serum<br>ELISA | Protein levels (pg/mL)<br><br>T: Cod proteins (15)<br>B: 0.57 (0.22, 0.93)<br>A: 0.93 (0.22, 0.93)<br><br>C: PLA (15)<br>B: 0.22 (0.11, 0.93)<br>A: 0.57 (0.22, 0.93)<br><br>T - C | ND<br>ND<br><br>ND<br>ND | (NS)<br>+63%<br><br>(NS)<br>+159%<br><br>+0.01 pg/mL (NS) | No effect on the levels of TNF- $\alpha$ .<br>No effects on body weight.                              |

**Legend:** <sup>a</sup>: Values are generally presented as the mean  $\pm$  standard deviation (SD), some data indicated as Median (Inter Quartile Range, IQR); <sup>b</sup>:(N): Sample size per group; <sup>c</sup>: CV%: Coefficient of variation in percentage estimated for each analyzed subgroup ((CV%) = (Standard Deviation/Mean)  $\times$  100); B: Before intervention; A: After intervention; <sup>d</sup>: Difference in % before and after intervention; T: Treatment; C: Control; T - C<sup>e</sup>: effect size calculated as the difference between the T and the C group (pg/mL); MetS: Metabolic syndrome; ND: Not determined; NR: Not reported; NS: Not significant; PLA: Placebo; RCT: Randomized clinical trial; TNF- $\alpha$ : tumour necrosis factor alpha.

**Table S5.** Reported changes in the circulatory levels of human TNF- $\alpha$  following dietary intervention with different products containing polyphenols and other phytochemicals.

|                                | Intervention                                                                                                                                   | Sample population    |                                                                            | TNF- $\alpha$ levels                      |                                                                                                                                                                             |                                              |                                                                                                     |                                                                                          |
|--------------------------------|------------------------------------------------------------------------------------------------------------------------------------------------|----------------------|----------------------------------------------------------------------------|-------------------------------------------|-----------------------------------------------------------------------------------------------------------------------------------------------------------------------------|----------------------------------------------|-----------------------------------------------------------------------------------------------------|------------------------------------------------------------------------------------------|
| Ref.                           | Tested product/main compounds<br><br>Study design                                                                                              | Country<br><br>Sex   | Body weight phenotype and comorbidities groups<br><br>Age <sup>a</sup> (y) | Type of Sample Method                     | Results per group <sup>a</sup> (N) <sup>b</sup>                                                                                                                             | CV% <sup>c</sup>                             | (Sig)<br><br>Effect<br><br>(% A <i>vs</i> B <sup>d</sup> per group<br><br>T – C <sup>e</sup> pg/mL) | General message conveyed by the article                                                  |
| Polyphenol-containing products |                                                                                                                                                |                      |                                                                            |                                           |                                                                                                                                                                             |                                              |                                                                                                     |                                                                                          |
| [114]                          | T: Quercetin (150 mg/d)<br><br>C: PLA<br><br>RCT (crossover), 42 d (35 d washout phase)                                                        | Germany<br><br>Mixed | Overweight/obese<br><br>45.1 $\pm$ 10.5                                    | Plasma<br><br>ELISA                       | Protein levels (pg/mL)<br><br>T: Quercetin (93)<br><br>B: 2.62 $\pm$ 2.40; A: 2.37 $\pm$ 2.45<br><br>C: PLA (93)<br><br>B: 2.48 $\pm$ 2.37; A: 2.40 $\pm$ 2.50<br><br>T - C | <br><br>91%; >100%<br><br><br><br>95%; >100% | <br><br>( <i>p</i> <0.01)<br><br>-9.5%<br><br><br>(NS)<br><br>-3.22%<br><br><br>-0.17 pg/mL (NS)    | No significant effect on the levels of TNF- $\alpha$ .<br><br>No effects on body weight. |
| [115]                          | T: Curcuminoids (1 g/d; curcumin, demethoxycurcumin, and bisdemethoxycurcumin)<br><br>C: PLA<br><br>RCT (crossover), 30 d (15 d washout phase) | Iran<br><br>NR       | Obese<br><br>18 – 65                                                       | Serum<br><br>Chemiluminescent immunoassay | Protein levels (pg/mL)<br><br><i>Phase 1</i><br><br>T: Curcuminoids (15)<br><br>B: 2.63 $\pm$ 2.81; A: 1.50 $\pm$ 0.69                                                      | <br><br><br><br><br><br>>100%; 46%           | <br><br><br>(NS)<br><br>-43%                                                                        | No effects on the levels of TNF- $\alpha$ .<br><br>Effects on body weight not reported.  |

|       |                                                                                             |                |                                                                                                                                         |                    |                                                                                                                                                                                                                                         |                                                              |                                                                                                              |                                                                                  |
|-------|---------------------------------------------------------------------------------------------|----------------|-----------------------------------------------------------------------------------------------------------------------------------------|--------------------|-----------------------------------------------------------------------------------------------------------------------------------------------------------------------------------------------------------------------------------------|--------------------------------------------------------------|--------------------------------------------------------------------------------------------------------------|----------------------------------------------------------------------------------|
|       |                                                                                             |                |                                                                                                                                         |                    | C: PLA (15)<br>B: $2.72 \pm 1.17$ ; A: $0.92 \pm 0.29$<br><br>T – C<br><br><i>Phase 2</i><br>T: Curcuminoids (15)<br>B: $1.29 \pm 0.92$ ; A: $1.09 \pm 0.46$<br><br>C: PLA (15)<br>B: $1.33 \pm 0.64$ ; A: $1.52 \pm 0.82$<br><br>T - C | 43%; 31%<br><br><br><br><br><br>71%; 42%<br><br><br>48%; 54% | (NS)<br>-66%<br><br>+0.67 pg/mL (NS)<br><br><br>(NS)<br>-15.5%<br><br>(NS)<br>+14.2%<br><br>-0.39 pg/mL (NS) |                                                                                  |
| [116] | T: Curcumin (500 mg/d) or Nano-curcumin (80 mg/d)<br><br>C: PLA<br><br>RCT (parallel), 60 d | Iran<br><br>NR | Overweight cardiac patients<br><br>T (Curcumin):<br>$55.3 \pm 7.1$<br><br>T (Nano-curcumin):<br>$56.2 \pm 6.9$<br><br>C: $54.1 \pm 5.2$ | Serum<br><br>ELISA | Protein levels (pg/mL)<br><br>T: Curcumin (30)<br>B: $19.61 \pm 4.72$ ; A: $16.01 \pm 3.52$<br><br>T: Nano-curcumin (30)<br>B: $18.95 \pm 4.09$ ; A: $14.06 \pm 3.27$<br><br>C: PLA (30):<br>B: $19.11 \pm 4.23$ ; A: $19.02 \pm 4.1$   | 24%; 22%<br><br><br>21%; 23%<br><br>22%; 21%                 | <br>( $p < 0.05$ )<br>-18.3%<br><br>( $p < 0.05$ )<br>-25.8%<br><br>(NS)<br>-0.47%                           | Significant reduction of TNF- $\alpha$ levels.<br><br>No effects on body weight. |



|       |                                                                                                                                                                                                                                  |                |                                                                              |                     |                                                                                                                                                                                                       |                                             |                                                                                                 |                                                                                                   |
|-------|----------------------------------------------------------------------------------------------------------------------------------------------------------------------------------------------------------------------------------|----------------|------------------------------------------------------------------------------|---------------------|-------------------------------------------------------------------------------------------------------------------------------------------------------------------------------------------------------|---------------------------------------------|-------------------------------------------------------------------------------------------------|---------------------------------------------------------------------------------------------------|
|       |                                                                                                                                                                                                                                  |                |                                                                              |                     | T – C (Curcumin)                                                                                                                                                                                      |                                             | -3.5 pg/mL ( $p<0.01$ )                                                                         |                                                                                                   |
|       |                                                                                                                                                                                                                                  |                |                                                                              |                     | T – C (Nano-curcumin)                                                                                                                                                                                 |                                             | -4.8 pg/mL ( $p<0.01$ )                                                                         |                                                                                                   |
| [117] | <p>T: Cocoa extract (1.4 g/d, 645 mg of polyphenols) + 15 % energy restricted diet</p> <p>C: PLA + 15% energy restricted diet</p> <p>RCT (parallel), 28 d</p>                                                                    | Spain<br>Mixed | Overweight/obese<br><br>57.3 ± 5.2                                           | Plasma<br><br>ELISA | <p>Protein levels (pg/mL)</p> <p>T: Cocoa extract (23)</p> <p>B: 1.31 ± 0.60; A: 1.13 ± 0.50</p> <p>C: PLA (24)</p> <p>B: 1.28 ± 0.63; A: 1.09 ± 0.49</p> <p>T - C</p>                                | <p>46% 44%</p> <p>49% 45%</p>               | <p>(<math>p&lt;0.05</math>)</p> <p>-13.7%</p> <p>(NS)</p> <p>-14.8%</p> <p>+0.01 pg/mL (NS)</p> | <p>No significant effect on TNF-<math>\alpha</math> levels.</p> <p>No effects on body weight</p>  |
| [118] | <p>T: Grape extract capsules (<math>\approx</math> 70 mg mix polyphenols) or Grape extract + Resveratrol capsules (+8 mg Resveratrol)</p> <p>C: PLA</p> <p>RCT (parallel), 1 capsule/d 180 d, 2 capsules/d for another 180 d</p> | Spain<br>Mixed | <p>Overweight/obese with CAD</p> <p>58 ± 9</p> <p>59 ± 10</p> <p>60 ± 12</p> | Serum<br><br>ELISA  | <p>Protein levels (pg/mL)</p> <p>T: Grape extract (25)</p> <p>B: 14.2 ± 8.7;</p> <p>A180d: 14.4 ± 8.6;</p> <p>A365d: 14.7 ± 9.9;</p> <p>T: Grape extract + Resveratrol (25)</p> <p>B: 14.9 ± 8.6;</p> | <p>61%</p> <p>60%</p> <p>67%</p> <p>58%</p> | <p>(NS)</p> <p>+1.4%</p> <p>+3.5%</p> <p>(NS)</p>                                               | <p>No significant effect on TNF-<math>\alpha</math> levels.</p> <p>No changes in body weight.</p> |

|  |  |  |  |  |                                                                                                                                                                                                                                                                                                 |                                     |                                                                                                                               |  |
|--|--|--|--|--|-------------------------------------------------------------------------------------------------------------------------------------------------------------------------------------------------------------------------------------------------------------------------------------------------|-------------------------------------|-------------------------------------------------------------------------------------------------------------------------------|--|
|  |  |  |  |  | A180d: 14.4 ± 8.6;<br>A365d: 13.8 ± 8.2;<br><br>C: PLA (25)<br>B: 13.7 ± 8.6;<br>A180d: 14.5 ± 9.2;<br>A365d: 15.2 ± 7.0;<br><br>T – C (Grape extract, 180d)<br>T – C (Grape extract, 365d)<br><br>T – C (Grape extract +<br>Resveratrol, 180d)<br>T – C (Grape extract +<br>Resveratrol, 365d) | 60%<br>59%<br><br>63%<br>63%<br>46% | -3.3%<br>-7.3%<br><br>(NS)<br>+6%<br>+11%<br><br>-0.6 pg/mL (NS)<br>-1.0 pg/mL (NS)<br><br>-1.3 pg/mL (NS)<br>-2.6 pg/mL (NS) |  |
|--|--|--|--|--|-------------------------------------------------------------------------------------------------------------------------------------------------------------------------------------------------------------------------------------------------------------------------------------------------|-------------------------------------|-------------------------------------------------------------------------------------------------------------------------------|--|

|       |                                                                                                                                                                                                                                              |              |                                                                                                                                                |                 |                                                                                                                                                                                                                                                                                                                                                                                                                      |                                              |                                                                                                                           |                                                                                                                                                                                                                                                                                        |
|-------|----------------------------------------------------------------------------------------------------------------------------------------------------------------------------------------------------------------------------------------------|--------------|------------------------------------------------------------------------------------------------------------------------------------------------|-----------------|----------------------------------------------------------------------------------------------------------------------------------------------------------------------------------------------------------------------------------------------------------------------------------------------------------------------------------------------------------------------------------------------------------------------|----------------------------------------------|---------------------------------------------------------------------------------------------------------------------------|----------------------------------------------------------------------------------------------------------------------------------------------------------------------------------------------------------------------------------------------------------------------------------------|
| [119] | <p>T: Grape extract capsules (<math>\approx 70</math> mg mix polyphenols) or Grape extract + Resveratrol capsules (+8 mg Resveratrol);</p> <p>C: Placebo (PLA);</p> <p>RCT (parallel), 1 capsule/d 180 d, 2 capsules/d for another 180 d</p> | Spain<br>Men | <p>Overweight/obese with CAD, T2DM, Hypertension</p> <p>57 <math>\pm</math> 10</p> <p>60 <math>\pm</math> 10</p> <p>63 <math>\pm</math> 12</p> | Serum<br>ELISA  | <p>Protein levels (pg/mL)</p> <p>T: Grape extract (13)</p> <p>B: 12.1 <math>\pm</math> 6.6; A365d: 11.9 <math>\pm</math> 5.1;</p> <p>T: Grape extract + Resveratrol (13)</p> <p>B: 11.7 <math>\pm</math> 5.5; A365d: 10.7 <math>\pm</math> 5.8;</p> <p>C: PLA (9)</p> <p>B: 12.5 <math>\pm</math> 6.4; A365d: 13.9 <math>\pm</math> 6.9;</p> <p>T – C (Grape extract)</p> <p>T – C (Grape extract + Resveratrol)</p> | <p>55% 43%</p> <p>47% 54%</p> <p>51% 50%</p> | <p>(NS)</p> <p>-1.6%</p> <p>(NS)</p> <p>-8.5%</p> <p>(NS)</p> <p>+11.2%</p> <p>-1.6 pg/mL (NS)</p> <p>-2.4 pg/mL (NS)</p> | <p>No significant effect on TNF-<math>\alpha</math> level.</p> <p>No changes in body weight with any of the two treatments.</p> <p>In the Grape extract + Resveratrol group down-regulation of <i>TNF-<math>\alpha</math></i> gene expression but not of protein release in PBMCs.</p> |
| [120] | <p>T: Freeze-dried Grape Powder (46 g/day, 15.6 mg /d of polyphenols)</p> <p>C: PLA</p> <p>RTC (crossover), 21 d (15 d washout phase)</p>                                                                                                    | USA<br>Mixed | <p>Obese</p> <p>20-60</p>                                                                                                                      | Plasma<br>ELISA | <p>Protein levels (pg/mL)</p> <p>T: Grape powder (24)</p> <p>B: 3.93 <math>\pm</math> 1.92; A: 3.75 <math>\pm</math> 2.18</p> <p>C: PLA (24)</p> <p>B: 3.81 <math>\pm</math> 2.05; A: 3.76 <math>\pm</math> 2.00</p>                                                                                                                                                                                                 | <p>49% 58%</p> <p>54% 53%</p>                | <p>(NS)</p> <p>-4.5%,</p> <p>(NS)</p> <p>1.3%</p>                                                                         | <p>No significant effects on the levels of TNF-<math>\alpha</math>.</p> <p>No effect on body weight.</p>                                                                                                                                                                               |

|       |                                                                                                                                                                                 |                           |                                      |                            |                                                                                                                                                                                                                                                                                                                                                    |                                                                 |                                                                                                                                                  |                                                                                                                              |
|-------|---------------------------------------------------------------------------------------------------------------------------------------------------------------------------------|---------------------------|--------------------------------------|----------------------------|----------------------------------------------------------------------------------------------------------------------------------------------------------------------------------------------------------------------------------------------------------------------------------------------------------------------------------------------------|-----------------------------------------------------------------|--------------------------------------------------------------------------------------------------------------------------------------------------|------------------------------------------------------------------------------------------------------------------------------|
|       |                                                                                                                                                                                 |                           |                                      |                            | T – C                                                                                                                                                                                                                                                                                                                                              |                                                                 | -0.13 pg/mL (NS)                                                                                                                                 |                                                                                                                              |
| [121] | <p>T: Grape powder (60 g/d, rich in polyphenols ~300 mg/d; mostly anthocyanins, flavonols)</p> <p>C: PLA</p> <p>RCT (crossover), 2-phases: post-prandial and 28 d treatment</p> | <p>USA</p> <p>Mixed</p>   | <p>Obese</p> <p>48.6 ± 15.4</p>      | <p>Plasma</p> <p>ELISA</p> | <p>Protein levels (pg/mL)</p> <p><i>Post-prandial (5 h)</i></p> <p>T: Grape powder (20)</p> <p>B: 1.5 ± 0.6; A: 1.3 ± 0.5</p> <p>C: PLA (20)</p> <p>B: 1.4 ± 0.4; A: 1.3 ± 0.6</p> <p>T – C</p> <p><i>28 d</i></p> <p>T: Grape powder (20)</p> <p>B: 1.5 ± 0.6; A: 1.3 ± 0.6</p> <p>C: PLA (20)</p> <p>B: 1.4 ± 0.4, A: 1.4 ± 0.6</p> <p>T – C</p> | <p>40%, 39%</p> <p>29%, 46%</p> <p>40%, 46%</p> <p>29%, 43%</p> | <p>(NS)</p> <p>-13.3%</p> <p>(NS)</p> <p>-7.1%</p> <p>-0.1 pg/mL (NS)</p> <p>(NS)</p> <p>-13.3%</p> <p>(NS)</p> <p>0%</p> <p>-0.2 pg/mL (NS)</p> | <p>No significant effects on the levels of TNF-<math>\alpha</math>.</p> <p>The effects on body weight were not reported.</p> |
| [122] | <p>T: Grape pomace extract + Omija fruit (342.5 mg/d + 57.5 mg/d for low dose</p>                                                                                               | <p>Korea</p> <p>Mixed</p> | <p>Overweight/obese</p> <p>30–70</p> | <p>Plasma</p> <p>ELISA</p> | <p>Protein levels (pg/mL)</p>                                                                                                                                                                                                                                                                                                                      |                                                                 |                                                                                                                                                  | <p>Significant but rather small reduction of TNF- <math>\alpha</math> levels with high dose of Grape</p>                     |

|       |                                                                                                                          |                          |                                                                   |                           |                                                                                                                                                                                                                                                                         |                                              |                                                                                                                                                     |                                                                                                              |
|-------|--------------------------------------------------------------------------------------------------------------------------|--------------------------|-------------------------------------------------------------------|---------------------------|-------------------------------------------------------------------------------------------------------------------------------------------------------------------------------------------------------------------------------------------------------------------------|----------------------------------------------|-----------------------------------------------------------------------------------------------------------------------------------------------------|--------------------------------------------------------------------------------------------------------------|
|       | group and 685 mg/d + 11 5 mg/d for high dose group)<br>C: PLA<br>RCT (parallel), 70 d                                    |                          |                                                                   |                           | <p>T: Grape pomace extract-high dose (26)<br/>B: 5.56 ± 2.96; A: 3.56 ± 2.79</p> <p>T: Grape pomace extract-low dose (26)<br/>B: 4.56 ± 2.66; A: 3.78 ± 2.47</p> <p>C: PLA (24)<br/>B: 4.87 ± 2.28; A: 4.24 ± 2.41</p> <p>T – C (high dose)</p> <p>T – C (low dose)</p> | <p>53% 78%</p> <p>58% 65%</p> <p>47% 57%</p> | <p>(<i>p</i>&lt;0.05)</p> <p>-36%</p> <p>(NS)</p> <p>-17%</p> <p>(NS)</p> <p>-13%</p> <p>-1.37 pg/mL (<i>p</i>&lt;0.05)</p> <p>-0.15 pg/mL (NS)</p> | <p>pomace extract + Omija fruit.<br/>No effect on body weight.</p>                                           |
| [123] | <p>T: Grape seed extract (300 mg/d containing 85% polyphenols) + LCD</p> <p>C: PLA + LCD</p> <p>RCT (parallel), 84 d</p> | <p>Iran</p> <p>Mixed</p> | <p>Overweight/obese</p> <p>T: 35.0 ± 1.9</p> <p>C: 33.5 ± 2.0</p> | <p>Serum</p> <p>ELISA</p> | <p>Protein levels (pg/mL)</p> <p>T: Grape seed extract (20)<br/>B: 24.3 ± 3.55 A: 17.9 ± 4.6</p> <p>C: PLA (20)<br/>B: 17.6 ± 0.74 A: 23.1 ± 3.48</p> <p>T – C</p>                                                                                                      | <p>15% 26%</p> <p>4% 15%</p>                 | <p>(<i>p</i>&lt;0.01)</p> <p>-26.3%,</p> <p>(<i>p</i>&lt;0.01)</p> <p>+31.25%</p>                                                                   | <p>Significant reduction of TNF-<math>\alpha</math> levels.</p> <p>Significant decreased in body weight.</p> |

|       |                                                                                               |                                     |                                                                    |                     |                                                                                                                                                                                                                  |                                        |                                                                                                 |                                                                                                                                                                         |
|-------|-----------------------------------------------------------------------------------------------|-------------------------------------|--------------------------------------------------------------------|---------------------|------------------------------------------------------------------------------------------------------------------------------------------------------------------------------------------------------------------|----------------------------------------|-------------------------------------------------------------------------------------------------|-------------------------------------------------------------------------------------------------------------------------------------------------------------------------|
|       |                                                                                               |                                     |                                                                    |                     |                                                                                                                                                                                                                  |                                        | -11.9 pg/mL<br>( $p=0.0001$ )                                                                   |                                                                                                                                                                         |
| [124] | T: Pomegranate peel extract (250 mg/d,<br><br>C: Placebo;<br><br>RTC (parallel), 56 d         | Bosnia and Herzegovina<br><br>Mixed | Overweight, T2DM<br><br>T: $57.9 \pm 6.1$<br><br>C: $56.9 \pm 6.7$ | Plasma<br><br>ELISA | Protein levels (pg/mL)<br><br>T: Pomegranate peel extract (30)<br><br>B: $0.17 (0.8 - 0.27)$ ;<br>A: $0.13 (0.6 - 0.23)$<br><br>C: PLA (14)<br><br>B: $0.18 (0.3 - 0.34)$<br>A: $0.19 (0.5 - 0.33)$<br><br>T - C | ND<br><br>ND<br><br>ND<br><br>ND       | <br><br>( $p<0.05$ )<br><br>-23%<br><br><br>(NS)<br><br>-5%<br><br><br>-0.05 pg/mL ( $p<0.05$ ) | Values estimated from figures (median (IQR)). Significant but rather small reduction of the levels of TNF- $\alpha$ with T.<br><br>Effects on body weight not reported. |
| [125] | T: Freeze-dried strawberries (50 g/d)<br>C: PLA<br>RCT (crossover), 84 d (14 d washout phase) | USA<br><br>Mixed                    | Obese, knee OA<br><br>$57 \pm 7$                                   | Serum<br><br>ELISA  | Protein levels (pg/mL)<br><br>T: Freeze-dried strawberries (8)<br><br>B: $5.5 \pm 1.5$ ; A: $2.8 \pm 2.6$<br><br>C: PLA (8)<br><br>B: $5.5 \pm 1.5$ ; A: $5.2 \pm 2.1$<br><br>T - C                              | <br><br>27% 93%<br><br><br><br>27% 40% | <br><br>( $p<0.05$ )<br><br>-49%<br><br><br>(NS)<br><br>5%<br><br><br>-2.7 pg/mL ( $p=0.02$ )   | Significant reduction of the levels of TNF- $\alpha$ with T.<br><br>No effects on body weight.                                                                          |

|       |                                                                                                                                                                                                    |                |                                                        |                 |                                                                                                                                                                                                                                                                                                                                                                          |                                                                 |                                                                                                                                                                                                            |                                                                                                                          |
|-------|----------------------------------------------------------------------------------------------------------------------------------------------------------------------------------------------------|----------------|--------------------------------------------------------|-----------------|--------------------------------------------------------------------------------------------------------------------------------------------------------------------------------------------------------------------------------------------------------------------------------------------------------------------------------------------------------------------------|-----------------------------------------------------------------|------------------------------------------------------------------------------------------------------------------------------------------------------------------------------------------------------------|--------------------------------------------------------------------------------------------------------------------------|
| [126] | <p>T: Frozen red raspberry (250 g/d containing 11.5 g fiber and 343 mg polyphenols, mostly anthocyanins, ellagitannins)</p> <p>C: PLA</p> <p>RCT (crossover), 2 phases: post-prandial and 28 d</p> | USA<br>Mixed   | Obese, T2DM<br>54.0 ± 4.2                              | Serum<br>ELISA  | <p>Protein levels (pg/mL)</p> <p><i>Post-prandial (4 h)</i></p> <p>T: Frozen red raspberry (25)</p> <p>B: 6.3 ± 12.5; A: 9.3 ± 32.5</p> <p>C: PLA (25)</p> <p>B: 4.7 ± 7.5; A: 18.7 ± 37.5</p> <p>T – C</p> <p><i>28 d</i></p> <p>T: Frozen red raspberry (22)</p> <p>B: 5.5 ± 7.0; A: 3.2 ± 9.8</p> <p>C: PLA (22)</p> <p>B: 5.5 ± 11.7; A: 5.3 ± 15.5</p> <p>T – C</p> | <p>&gt;100%</p> <p>&gt;100%</p> <p>&gt;100%</p> <p>&gt;100%</p> | <p>(NS)</p> <p>+47%</p> <p>(NS)</p> <p>+297%</p> <p>-11.0 pg/mL (<math>p&lt;0.05</math>)</p> <p>(<math>p&lt;0.05</math>)</p> <p>-42%</p> <p>(NS)</p> <p>-4%</p> <p>-2.1 pg/mL (<math>p&lt;0.05</math>)</p> | <p>Significant reduction of the levels of TNF-<math>\alpha</math> with T.</p> <p>Effect on body weight not reported.</p> |
| [127] | <p>T: Black soybean testa extracts (2.5 g/d rich in anthocyanins)</p> <p>C: PLA (starch 2.5 g/d)</p>                                                                                               | Korea<br>Mixed | Overweight/obese<br>T: 30.30 ± 9.42<br>C: 30.88 ± 9.18 | Plasma<br>ELISA | <p>Protein levels (pg/mL)</p> <p>T: Soybean extract (32)</p> <p>B: 15.96 ± 3.73;</p>                                                                                                                                                                                                                                                                                     | 23%                                                             | ( $p<0.05$ )                                                                                                                                                                                               | <p>No significant effects on the levels of TNF-<math>\alpha</math>.</p> <p>No effect on body weight.</p>                 |

|                                         |                                                                                                                                                            |                 |                                                            |                     |                                                                                                                                                                                                                                                                          |                              |                                                                               |                                                                                                                                                                                                         |
|-----------------------------------------|------------------------------------------------------------------------------------------------------------------------------------------------------------|-----------------|------------------------------------------------------------|---------------------|--------------------------------------------------------------------------------------------------------------------------------------------------------------------------------------------------------------------------------------------------------------------------|------------------------------|-------------------------------------------------------------------------------|---------------------------------------------------------------------------------------------------------------------------------------------------------------------------------------------------------|
|                                         | RCT (parallel), 56 d                                                                                                                                       |                 |                                                            |                     | A: 15.17 ± 2.97<br><br>C: PLA (31)<br>B: 43.01 ± 19.49;<br>A: 39.63 ± 12.69<br><br>T – C                                                                                                                                                                                 | 19%<br><br>45%<br>32%        | -5%<br><br>( <i>p</i> <0.05)<br>-8%<br><br>+2.61 pg/mL (NS)                   |                                                                                                                                                                                                         |
| Other phytochemical-containing products |                                                                                                                                                            |                 |                                                            |                     |                                                                                                                                                                                                                                                                          |                              |                                                                               |                                                                                                                                                                                                         |
| [128]                                   | T: Fruit + Vegetable concentrate powder (6 capsules/d, β-carotene, α-tocopherol, vitamin C, folate, polyphenols)<br><br>C: PLA<br><br>RCT (parallel), 56 d | UK<br><br>Mixed | Overweight/obese<br><br>T: 61.4 ± 1.5<br><br>C: 57.9 ± 1.4 | Plasma<br><br>ELISA | Protein levels (pg/mL)<br><br>T: Fruit + Vegetable (28)<br><br>B: 1.04 (0.87, 1.41)<br>A: 1.02 (0.55, 1.41)<br><br>C: PLA (28)<br><br>B: 1.07 (0.79, 1.22)<br>A: 0.94 (0.82, 1.26)<br><br>T - C<br><br><i>Subgroup (CRP ≥3.0 mg/mL)</i><br><br>T: Fruit + Vegetable (16) | <br><br>ND<br><br><br><br>ND | <br><br>( <i>p</i> =0.037)<br>-2%<br><br>(NS)<br>-12%<br><br>+0.11 pg/mL (NS) | For all subjects:<br><br>No reduction in TNF-α levels.<br><br>No effects on body weight.<br><br>For subjects with CRP (≥3.0 mg/mL):<br><br>Reduction in TNF-α levels.<br><br>No effects on body weight. |



|       |                                                                                                                                                                                                                                                               |                    |                                                                |                    |                                                                                                                                                                      |                                  |                                                                           |                                                                         |
|-------|---------------------------------------------------------------------------------------------------------------------------------------------------------------------------------------------------------------------------------------------------------------|--------------------|----------------------------------------------------------------|--------------------|----------------------------------------------------------------------------------------------------------------------------------------------------------------------|----------------------------------|---------------------------------------------------------------------------|-------------------------------------------------------------------------|
|       |                                                                                                                                                                                                                                                               |                    |                                                                |                    | B: 1.13 (0.95, 1.52)<br>A: 0.95 (0.70, 1.40)<br><br>C: PLA (15)<br>B: 1.07 (0.79, 1.30)<br>A: 0.96 (0.87, 1.26)<br><br>T - C                                         | ND<br><br><br>ND                 | ( $p=0.07$ )<br>-16%<br><br>(NS)<br>-10%<br><br>-0.07 pg/mL ( $p=0.035$ ) |                                                                         |
| [129] | T: Juice Plus+ Premium®<br>(6 capsules/d, 2.91 mg<br>carotene, 18.7 mg Vitamin<br>E, 159 mg Vitamin C, 318<br>$\mu$ g folate, 6.1 mg lutein, 1<br>mg lycopene and 0.15 mg<br>astaxanthin)<br><br>C: PLA<br><br>RCT (crossover), 112 d (28<br>d washout phase) | Spain<br><br>Mixed | Mixed subjects (BMI<br>between 18.5 and 35)<br><br>34 $\pm$ 11 | Serum<br><br>ELISA | Protein levels (pg/mL)<br><br>T: Juice Plus (92)<br>B: 5.82 $\pm$ 1.14; A: 5.22 $\pm$ 1.21<br><br>C: PLA (92)<br>B: 5.69 $\pm$ 1.02; A: 5.30 $\pm$ 0.87<br><br>T - C | <br><br>18%; 16%<br><br>19%; 23% | ( $p<0.01$ )<br>-10%<br><br>( $p<0.05$ )<br>-7%<br><br>-0.21 pg/mL (NS)   | No reduction in TNF- $\alpha$ levels.<br><br>No effects on body weight. |
| [130] | T: Melatonin (6 mg/d) +<br>LCD<br><br>C: PLA + LCD<br><br>RCT (parallel), 40 d                                                                                                                                                                                | Iran<br><br>Women  | Obese<br><br>T: 33.8 $\pm$ 6.9<br>C: 34.8 $\pm$ 7.3            | Serum<br><br>ELISA | Protein levels (pg/mL)<br><br>T: Melatonin (22)<br>B: 3.52 $\pm$ 0.72; A: 1.73 $\pm$ 0.07<br><br>C: PLA (22)                                                         | <br><br>20%; 4%<br><br>18%; 19%  | ( $p<0.05$ )<br>-50%<br><br>(NS)                                          | Reduction of TNF- $\alpha$ levels.<br><br>No effect on body weight.     |

|       |                                                                                                       |                   |                                                     |                 |                                                                                                                                                                          |                                             |                                                         |                                                                     |
|-------|-------------------------------------------------------------------------------------------------------|-------------------|-----------------------------------------------------|-----------------|--------------------------------------------------------------------------------------------------------------------------------------------------------------------------|---------------------------------------------|---------------------------------------------------------|---------------------------------------------------------------------|
|       |                                                                                                       |                   |                                                     |                 | B: 2.82 ± 0.52; A: 2.01 ± 0.38                                                                                                                                           |                                             | -29%                                                    |                                                                     |
|       |                                                                                                       |                   |                                                     |                 | T - C                                                                                                                                                                    |                                             | -0.98 pg/mL ( <i>p</i> =0.02)                           |                                                                     |
| [131] | T: Garlic tablets (1000 mg/d containing 2.5 mg of allicin),<br><br>C: PLA<br><br>RCT (parallel), 84 d | Iran<br><br>Women | Overweight/obese,<br><br>knee OA,<br><br>58.7 ± 7.4 | Serum<br><br>NR | Protein levels (pg/mL)<br><br>T: Garlic tablets (39)<br><br>B: 62.8 ± 73.3; A: 64.1 ± 73.5<br><br><br>C: PLA (37)<br><br>B: 61.8 ± 64.7; A: 49.1 ± 40.5<br><br><br>T - C | <br><br>117%; 115%<br><br><br><br>105%; 82% | <br><br>+2%<br><br><br>-21%<br><br><br>+14.0 pg/mL (NS) | No effect on the levels of TNF-α.<br><br>No effects on body weight. |

**Legend:** <sup>a</sup>: Most values presented as the mean ± standard deviation (SD), some data indicated as Median (Inter Quartile Range, IQR); <sup>b</sup>:(*N*): Sample size per group; <sup>c</sup>: CV%: Coefficient of variation in percentage estimated for each analyzed subgroup ((**CV%**) = (**Standard Deviation/Mean**) × 100); B: Before intervention; A: After intervention; <sup>d</sup>: Difference in % before and after intervention; T: Treatment; C: Control; T – C<sup>e</sup>: effect size calculated as the difference between the T and the C group (pg/mL); BMI: Body mass index; CAD: Coronary artery disease; LCD: Low calories diet; ND: Not determined; NR: Not reported; NS: Not significant; OA: Osteoarthritis; PBMCs: Peripheral blood mononuclear cells; PLA: Placebo; RCT: Randomized clinical trial; T2DM: type 2 diabetes mellitus; TNF-α: tumor necrosis factor alpha.

**Table S6.** Reported changes in the circulatory levels of human TNF- $\alpha$  following dietary intervention with foods rich in mixed bioactive phytochemicals.

| Ref.  | Intervention<br>Tested product/main compounds<br>Study design                                                                | Sample population  |                                                                        | TNF- $\alpha$ levels                  |                                                                                                                                                                             |                         |                                                                                  |                                                                                                                                                                       |
|-------|------------------------------------------------------------------------------------------------------------------------------|--------------------|------------------------------------------------------------------------|---------------------------------------|-----------------------------------------------------------------------------------------------------------------------------------------------------------------------------|-------------------------|----------------------------------------------------------------------------------|-----------------------------------------------------------------------------------------------------------------------------------------------------------------------|
|       |                                                                                                                              | Country<br>Sex     | Body weight phenotype and comorbidities groups<br>Age (y) <sup>a</sup> | Type of Sample Method                 | Results per group <sup>a</sup> (N) <sup>b</sup>                                                                                                                             | CV% <sup>c</sup>        | (Sig) Effect<br>(% A vs B <sup>d</sup> per group<br>T – C <sup>e</sup> pg/mL)    | General message conveyed by the article.                                                                                                                              |
| [132] | T: Juçara pulp (5 g/d; phenolics, flavonoids)<br>C: PLA<br>RCT (parallel), 42 d                                              | Brazil<br>Mixed    | Obese<br>T: 45.1 $\pm$ 3.4<br>C: 45.8 $\pm$ 2.6                        | Supernatant of isolated PBMC<br>ELISA | Protein levels (pg/mg of proteins)<br><br>T: Jucara pulp (10)<br>B: 650 $\pm$ 200; A: 300 $\pm$ 150<br><br>C: PLA (10)<br>B: 780 $\pm$ 200; A: 300 $\pm$ 100<br><br>T - C   | 30% 50%<br><br>25% 33%  | (NS)<br>-54%<br><br>(NS)<br>-61%<br><br>+130 (NS)                                | No significant effect on the expression and release of TNF- $\alpha$ by isolated PBMC. Effect on body weight not reported.                                            |
| [133] | T: Queen Garnet plums juice (250 mL/d; anthocyanins, quercetin)<br>C: PLA (Raspberry cordial)<br>RCT (parallel), 84 d        | Australia<br>Mixed | Overweight/obese with Hypertension<br>20-60                            | Plasma<br>ELISA                       | Protein levels (pg/mL)<br><br>T: QG juice (15)<br>B: 5.6 $\pm$ 2.6; A: 3.4 $\pm$ 3.4<br><br>C: Raspberry cordial (14)<br>B: 7.2 $\pm$ 5.9; A: 7.0 $\pm$ 3.2<br><br>T - C    | 46% 100%<br><br>82% 46% | ( <i>p</i> <0.05)<br>-39%<br><br>(NS)<br>-3%<br><br>-2.0 pg/mL ( <i>p</i> <0.05) | Significant reduction of the levels of TNF- $\alpha$ with T. No effect on body weight.                                                                                |
| [134] | T: Tart cherry juice (240 mL/d; anthocyanins, flavonoids, phenolics)<br>C: PLA<br>RCT (crossover), 28 d (14 d washout phase) | USA<br>Mixed       | Overweight/obese<br>38.1 $\pm$ 12.5                                    | Plasma<br>ELISA                       | Protein levels (pg/mL)<br><br>T: Tart cherry juice (10)<br>B: 5.83 $\pm$ 1.14; A: 5.53 $\pm$ 0.94<br><br>C: PLA (10)<br>B: 5.56 $\pm$ 1.07; A: 5.47 $\pm$ 0.94<br><br>T – C | 19% 17%<br><br>19% 17%  | (NS)<br>-5%<br><br>(NS)<br>-1%<br><br>-0.21 pg/mL (NS)                           | No significant effect on the levels of TNF- $\alpha$ . No effect on body weight.                                                                                      |
| [135] | T: Tomato juice (330 mL/day; carotenoids, phytosterols, phenolics, flavonoids, anthocaynins)<br>C: PLA                       | Iran<br>Women      | Overweight/obese<br>T: 23.3 $\pm$ 3.6<br>C: 23.2 $\pm$ 2.9             | Serum<br>ELISA                        | Protein levels (pg/ml)<br><br>T: Tomato juice (53)<br>B: 73.2 $\pm$ 92.45; A: NR                                                                                            | ND                      | ND                                                                               | Authors did not present TNF- $\alpha$ values before and (or) after the treatment but they reported a significant reduction of TNF- $\alpha$ levels, especially in the |

|       |                                                                                                                                                              |                 |                                                             |    |                                                                                                                                                                                                                                                                                                  |                                                                                                                                                                                                                      |                                                                                                                                                                                                                                    |                                                                                                               |
|-------|--------------------------------------------------------------------------------------------------------------------------------------------------------------|-----------------|-------------------------------------------------------------|----|--------------------------------------------------------------------------------------------------------------------------------------------------------------------------------------------------------------------------------------------------------------------------------------------------|----------------------------------------------------------------------------------------------------------------------------------------------------------------------------------------------------------------------|------------------------------------------------------------------------------------------------------------------------------------------------------------------------------------------------------------------------------------|---------------------------------------------------------------------------------------------------------------|
|       | RCT (parallel), 20 d                                                                                                                                         |                 |                                                             |    | C: PLA (51)<br>B: 66.7 ± 84.5; A: NR<br><br>T – C<br><br><i>Subgroup overweight</i><br>T: Tomato juice (43)<br>B: NR; A: NR<br><br>C: PLA (42)<br>B: NR; A: NR<br><br>T – C<br><br><i>Subgroup Obese</i><br>T: Tomato juice (10)<br>B: NR; A: NR<br><br>C: PLA (9):<br>B: NR; A: NR<br><br>T – C | ND<br><br><br><br><br><br><br><br><br><br>ND<br><br><br><br><br><br><br><br><br><br>ND<br><br><br><br><br><br><br><br><br><br>ND<br><br><br><br><br><br><br><br><br><br>ND<br><br><br><br><br><br><br><br><br><br>ND | ND<br><br><br><br><br><br><br><br><br><br>ND<br><br><br><br><br><br><br><br><br><br>ND<br><br><br><br><br><br><br><br><br><br>ND<br><br><br><br><br><br><br><br><br><br>ND<br><br><br><br><br><br><br><br><br><br>+21.3 pg/mL (NS) | overweight subgroup. No effect on the levels of TNF- α in obese subgroup. Effect on body weight not reported. |
| [136] | T: Red sorghum flaked biscuits (45 g/d; carotenoids, phytosterols, phenolics, flavonoids) + LCD;<br>C: Wheat biscuits (45 g/d) + LCD<br>RCT (parallel), 84 d | Australia Mixed | Overweight/mildly obese<br>T: 48.1 ± 10.3<br>C: 48.6 ± 11.4 | NR | Protein levels (pg/mL)<br><br>T: Sorghum biscuits (26)<br>B: 3.2 ± 1.2; A: NR<br><br>C: Wheat biscuits (30)<br>B: 2.9 ± 1.3; A: NR<br><br>T – C                                                                                                                                                  | 37% ND<br><br><br><br><br><br><br><br><br><br>45% ND                                                                                                                                                                 | ND<br><br><br><br><br><br><br><br><br><br>ND<br><br><br><br><br><br><br><br><br><br>-0.3 pg/mL (NS)                                                                                                                                | No significant effect on the levels of TNF-α. No effect on body weight.                                       |

**Legend:** º: Values are presented as the mean ± SD; º(N): Sample size per group; º: CV%: Coefficient of variation in percentage estimated for each analyzed subgroup ((CV%) = (Standard Deviation/Mean) × 100); B: Before intervention; A: After intervention; º: Difference in % before and after intervention; T: Treatment; C: Control; T – Cº: effect size calculated as the difference between the T and the C group (pg/mL); LCD: Low calorie diet; ND: Not determined; NR: Not reported; NS: Not significant; PBMCs: peripheral blood mononuclear cells; PLA: Placebo; QC: Queen Garnet; RCT: Randomized clinical trial; TNF-α: tumor necrosis factor alpha.

**Table S7.** Circulating levels of TNF- $\alpha$  across different genotypes for various SNPs located within the regulatory region of the *TNFA* gene.

| Ref   | Genetic variant                | Sample population |                                                                                        |                | Genotype<br>Protein levels <sup>a</sup> (pg/mL)<br>(CV%) <sup>c</sup> |                                                     |                                                       |                                     |                                   |
|-------|--------------------------------|-------------------|----------------------------------------------------------------------------------------|----------------|-----------------------------------------------------------------------|-----------------------------------------------------|-------------------------------------------------------|-------------------------------------|-----------------------------------|
|       |                                | Country Sex       | Phenotype group Age <sup>a</sup> (y)                                                   | N <sup>b</sup> | Sample Method                                                         | Homozygous reference (N) <sup>d</sup>               | Heterozygous (N) <sup>d</sup>                         | Homozygous variant (N) <sup>d</sup> | (Sig) Effect (pg/mL) <sup>e</sup> |
| [137] | (-308 G/A)<br><i>rs1800629</i> | Brazil Mixed      | High cardiometabolic risk (pre-diabetes or MetS)<br>56.5 $\pm$ 11.6                    | 138            | Plasma Immuno-enzyme chemi-luminescent assay                          | GG (107)<br>0.11 (0.09 – 0.13) <sup>f</sup><br>(ND) | GA+AA (28)<br>0.11 (0.09 – 0.14) <sup>f</sup><br>(ND) |                                     | (NR)<br>(NC)                      |
| [139] | (-308 G/A)<br><i>rs1800629</i> | Spain Mixed       | Obese patients<br>45.8 $\pm$ 16.4                                                      | 128            | Unclear ELISA                                                         | GG (91)<br>1.4 $\pm$ 0.6<br>(42.9%)                 | GA+AA (37)<br>1.6 $\pm$ 1.3<br>(81.3%)                |                                     | (NR)<br>+0.2                      |
|       |                                |                   |                                                                                        | 133            |                                                                       | GG (106)<br>2.01 $\pm$ 1.8<br>(89.6%)               | GA+AA (27)<br>1.8 $\pm$ 2.1<br>(>100%)                |                                     | (NR)<br>+0.2                      |
| [41]  | (-308 G/A)<br><i>rs1800629</i> | Brazil Mixed      | Mix (normal, overweight, T2DM)<br>56.0 (12.0) <sup>f</sup><br>53.0 (18.0) <sup>f</sup> | 264            | Plasma Cytometric bed array                                           | GG (125)<br>0.095 (0.055) <sup>f</sup><br>(ND)      | GA (38)<br>0.090 (0.063) <sup>f</sup><br>(ND)         | AA (1)<br>0.048<br>(ND)             | (NS)<br>-0.005, -0.047            |
|       |                                |                   | T2DM<br>56.0 (12.0) <sup>f</sup>                                                       | 102            |                                                                       | GG (45)<br>0.095 (0.045) <sup>f</sup><br>(ND)       | GA (44)<br>0.085 (0.044) <sup>f</sup><br>(ND)         | AA (1)<br>0.048<br>(ND)             | (NS)<br>-0.01, -0.047             |
| [140] | (-308 G/A)<br><i>rs1800629</i> | Brazil Mixed      | General population<br>38.4 $\pm$ 12.5,<br>38.2 $\pm$ 12.1                              | 280            | Plasma Multiplex                                                      | GG (226)<br>4.9 $\pm$ 2.0<br>(41%)                  | GA+AA (54)<br>4.8 $\pm$ 1.8<br>(38%)                  |                                     | (NS)<br>-0.1                      |
|       | (-857C/T)<br><i>rs1799724</i>  |                   | General population<br>37.8 $\pm$ 12.2,<br>40.7 $\pm$ 12.6                              |                |                                                                       | CC (227)<br>4.9 $\pm$ 2.0<br>(41%)                  | CT+TT (52)<br>4.6 $\pm$ 2.0<br>(43%)                  |                                     | (NS)<br>-0.2                      |
|       | (-1031T/C)<br><i>rs1799964</i> |                   | General population<br>37.9 $\pm$ 12.7,<br>38.9 $\pm$ 11.9                              |                |                                                                       | TT (152)<br>4.9 $\pm$ 1.8<br>(37%)                  | TC+CC (128)<br>4.6 $\pm$ 1.9<br>(41%)                 |                                     | (NS)<br>-0.3                      |
|       | (-238G/A)<br><i>rs361525</i>   |                   | General population<br>38.2 $\pm$ 12.6,                                                 |                |                                                                       | GG (243)<br>4.8 $\pm$ 1.9                           | GA+AA (37)<br>5.5 $\pm$ 2.1                           |                                     | ( <i>p</i> =0.033)<br>+0.7        |

|       |                                |                   |                                                      |     |                 |                                                    |                                                     |                                                   |                                                            |
|-------|--------------------------------|-------------------|------------------------------------------------------|-----|-----------------|----------------------------------------------------|-----------------------------------------------------|---------------------------------------------------|------------------------------------------------------------|
|       |                                |                   | 39.5 ± 10.9                                          |     |                 | (40%)                                              | (38%)                                               |                                                   |                                                            |
| [141] | (-308 G/A)<br><i>rs1800629</i> | Poland<br>Women   | MetS<br>53.0 ± 5.0                                   | 253 | Serum<br>ELISA  | GG (191)<br>3.5 ± 14.9<br>(>100%)                  | GA (54)<br>3.2 ± 8.4<br>(>100%)                     | AA (8)<br>4.0 ± 4.4<br>(>100%)                    | (NS)<br>-0.3, +0.5                                         |
|       |                                |                   |                                                      | 90  |                 | GG (65)<br>4.2 ± 9.2<br>(>100%)                    | GA (25)<br>3.4 ± 6.1<br>(>100%)                     | NR                                                | (NS)<br>-0.8                                               |
| [142] | (-308 G/A)<br><i>rs1800629</i> | India<br>Mixed    | NAlb<br>53.9 ± 10.9                                  | 196 | Plasma<br>ELISA | GG (121)<br>56.2 (48.7 – 65.9)<br>(ND)             | GA (47)<br>(NR)                                     | AA (28)<br>99.1 (46.2 – 143.6) (ND)               | (NR)<br>+42.9                                              |
| [42]  | (-308 G/A)<br><i>rs1800629</i> | Pakistan<br>Mixed | Healthy<br>normoweight<br>46.5 ± 8.2                 | 200 | Serum<br>ELISA  | GG (102)<br>14.0 (5.5 – 20.5) <sup>f</sup><br>(ND) | GA (76)<br>8.0 (6.0 – 13.5) <sup>f</sup><br>(ND)    | AA (22)<br>18.0 (7.0 – 83.0) <sup>f</sup><br>(ND) | (NS)<br>-6.0<br>+4.0                                       |
|       |                                |                   | MetS overweight<br>47.0 ± 8.0                        | 224 |                 | GG (100)<br>13.0 (7.0 – 43.0) <sup>f</sup><br>(ND) | GA (101)<br>30.0 (12.0 – 60.0) <sup>f</sup><br>(ND) | AA (23)<br>68.0 (26.0 – 146) <sup>f</sup><br>(ND) | ( <i>p</i> =0.060)<br>+17.0<br>( <i>p</i> =0.001)<br>+38.0 |
| [143] | (-308 G/A)<br><i>rs1800629</i> | Iraq<br>Mixed     | Patients with vitiligo<br>33.0 ± 12.7<br>28.8 ± 12.4 | 40  | Serum<br>ELISA  | GG (27)<br>6.9 ± 4.8<br>(70%)                      | GA (11)<br>5.8 ± 2.9<br>(50%)                       | AA (2)<br>4.1 ± 0.6<br>(15%)                      | (NR)<br>-1.1<br>-2.5                                       |
|       |                                |                   |                                                      | 80  |                 | GG (46)<br>13.5 ± 16.5<br>(>100%)                  | GA (21)<br>11.5 ± 7.8<br>(68%)                      | AA (13)<br>12.9 ± 14.5<br>(>100%)                 | (NS)<br>-2.0<br>-0.6                                       |
| [144] | (-308 G/A)<br><i>rs1800629</i> | Austria<br>Mixed  | Patients with AAA<br>69.7 ± 9.6<br>70.5 ± 7.0        | 216 | Plasma<br>ELISA | GG (115)<br>28.1 (31.6) <sup>f</sup><br>(>100%)    | GA+AA (101)<br>78.2 (93.3) <sup>f</sup><br>(>100%)  |                                                   | ( <i>p</i> =0.045)<br>+50.1                                |

**Legend:** <sup>a</sup>: Data are shown as the mean value ± SD unless otherwise indicated; <sup>b</sup>: Sample size of the full genotyped group; <sup>c</sup>: CV%: Coefficient of variation (%) ((CV%) = (Standard Deviation/Mean) × 100); <sup>d</sup>: Sample size of each of the genotype subgroups; <sup>e</sup>: Change (effect size) attributed to a different genotype estimated as the difference between heterozygous – homozygous reference and between homozygous variant – homozygous reference; <sup>f</sup>: median (IQR); A: Adenine; AAA: Abdominal aortic aneurism; C: Cytosine; G: Guanine; MetS: Metabolic syndrome; NAlb: Normoalbuminuria; NC: No change; ND: Not determined; NR: Not reported; NS: Not significant; T: Thymine; T2DM: Type 2 diabetes mellitus.

**Table S8.** Circulating levels of TNF- $\alpha$  across different genotypes for different SNPs located in various genes related to obesity, inflammatory and metabolic disorders.

| Ref   | SNP description             |                                                      | Sample population                     |                                                        |                | Genotype<br>Protein levels <sup>a</sup> (pg/mL)<br>(CV%) <sup>c</sup> |                                           |                                            |                                         |                                      |
|-------|-----------------------------|------------------------------------------------------|---------------------------------------|--------------------------------------------------------|----------------|-----------------------------------------------------------------------|-------------------------------------------|--------------------------------------------|-----------------------------------------|--------------------------------------|
|       | Gen/<br>SNP                 | Metabolic<br>association                             | Country<br>Sex                        | Phenotype<br>group<br>Age <sup>a</sup> (y)             | N <sup>b</sup> | Sample<br>Method                                                      | Homozygous<br>reference (N <sup>d</sup> ) | Heterozygous<br>(N <sup>d</sup> )          | Homozygous<br>variant (N <sup>d</sup> ) | (Sig)<br>Effect (pg/mL) <sup>e</sup> |
| [145] | <i>MTHFR</i> /<br>C677T     | Body fat<br>accumulation<br>Inflammatory<br>response | Brazil<br>Women                       | Overweight/<br>Obese<br>44.3 $\pm$ 9.3                 | 24             | Serum<br>Chemi-<br>luminiscent<br>solid-phase<br>system               | CC (8)<br>5.8 $\pm$ 8.3<br>(>100%)        | CT (8)<br>9.5 $\pm$ 8.6<br>(90.5%)         | TT (8)<br>3.1 $\pm$ 2.3<br>(74.2%)      | (NR)<br>+3.7<br>-2.7                 |
|       |                             |                                                      |                                       | Overweight/<br>Obese<br>44.8 $\pm$ 12.5                | 24             |                                                                       | CC (8)<br>7.7 $\pm$ 12.4<br>(>100%)       | CT (8)<br>5.0 $\pm$ 4.6<br>(92.0%)         | TT (8)<br>6.8 $\pm$ 5.2<br>(76.5%)      | (NR)<br>-2.7<br>-0.9                 |
| [146] | <i>PPARD</i> /<br>-87T>C    | Plasma lipid<br>profile                              | China<br>Mixed                        | T2DM<br>63.5 $\pm$ 10.5                                | 286            | Plasma<br>ELISA                                                       | TT (136)<br>12.8 $\pm$ 7.4<br>(57.8%)     | TC (128)<br>11.1 $\pm$ 4.8<br>(43.2%)      | CC (22)<br>9.7 $\pm$ 4.2<br>(43.3%)     | ( <i>p</i> <0.05)<br>-1.7<br>-3.1    |
|       |                             |                                                      |                                       | Normal<br>glucose<br>64.6 $\pm$ 12.6                   | 158            |                                                                       | TT (75)<br>11.0 $\pm$ 6.7<br>(61.0%)      | TC (72)<br>11.1 $\pm$ 7.5<br>(67.6%)       | CC (11)<br>12.1 $\pm$ 8.8<br>(72.7%)    | (NS)<br>+0.1<br>+1.1                 |
| [147] | <i>VDR</i> /<br>FOK1        | Bone mineral<br>density                              | Iran<br>Women                         | Obese<br>37.8 $\pm$ 11.1,<br>42.0 $\pm$ 13.1           | 264            | Serum<br>(NR)                                                         | FF (184)<br>5.1 $\pm$ 6.4<br>(>100%)      | Ff + ff (80)<br>12.6 $\pm$ 26.6<br>(>100%) |                                         | ( <i>p</i> =0.01)<br>+7.5            |
| [148] | <i>CLOCK</i> /<br>rs3749474 | Circadian rhythm<br>and energy<br>balance            | USA<br>Mixed                          | GOLDN<br>population<br>(overweight)<br>48.5 $\pm$ 16.3 | 1110           | Plasma<br>Enzyme-<br>linked<br>immune<br>sorbent<br>assay             | CC (427)<br>3.3 $\pm$ 8.3<br>(>100%)      | TT+CC (666)<br>3.6 $\pm$ 6.7<br>(>100%)    |                                         | (NS)<br>+0.3                         |
|       | <i>CLOCK</i> /<br>rs4580704 |                                                      |                                       |                                                        |                |                                                                       | CC (481)<br>3.6 $\pm$ 7.0<br>(>100%)      | GG+CG (619)<br>3.3 $\pm$ 8.0<br>(>100%)    |                                         | (NS)<br>-0.3                         |
|       | <i>CLOCK</i> /<br>rs1801260 |                                                      |                                       |                                                        |                |                                                                       | AG+AA (914)<br>3.5 $\pm$ 12.7<br>(>100%)  |                                            | GG (183)<br>3.1 $\pm$ 5.7<br>(>100%)    | (NS)<br>-0.4                         |
| [149] | <i>IL6</i> /<br>rs1800795   | Inflammation,<br>lipid metabolism,<br>energy balance | Poland<br>Women<br>Post-<br>menopause | Central<br>obesity + $\geq$ 1<br>feature MetS<br>60.5  | 144            | Serum<br>ELISA                                                        | GG (36)<br>8.2 $\pm$ 3.6<br>(43.9%)       | GC+CC (108)<br>11.3 $\pm$ 7.3<br>(64.6%)   |                                         | (NS)<br>+3.1                         |
| [150] | <i>UCP3</i> /               | Energy balance                                       | Spain                                 |                                                        | 64             | Unclear                                                               | CC (NR)                                   | CT+TT (NR)                                 |                                         | (NR)                                 |

|       |                               |                                                                                |                                                 |                                                                        |      |                                             |                                                       |                                                          |                               |                           |
|-------|-------------------------------|--------------------------------------------------------------------------------|-------------------------------------------------|------------------------------------------------------------------------|------|---------------------------------------------|-------------------------------------------------------|----------------------------------------------------------|-------------------------------|---------------------------|
|       | -55CT                         |                                                                                | Mixed                                           | Obese non diabetic NR                                                  |      |                                             | 3.9 ± 2.7 (69.2%)                                     | 2.3 ± 2.7 (>100%)                                        |                               | -1.6                      |
|       |                               |                                                                                |                                                 |                                                                        | 67   |                                             | CC (NR)<br>4.3 ± 2.8 (65.1%)                          | CT+TT (NR)<br>4.2 ± 2.9 (69.0%)                          |                               | (NR)<br>-0.1              |
| [151] | FTO/<br>rs9939609             | Associated with obesity                                                        | Spain NR                                        | Obese (BMI>40)<br>50.0 (17.3) <sup>‡</sup><br>48.9 (16.2) <sup>‡</sup> | 129  | Serum ELISA                                 | TT (41)<br>7.0 (6.3) <sup>‡</sup><br>(ND)             | AT+AA (88)<br>6.3 (4.4) <sup>‡</sup><br>(ND)             |                               | (NS)<br>-0.7              |
| [152] | TLR1/<br>A743G &<br>T1805G    | Immune response to infections and vaccination.<br>Levels of cytokines and age. | Germany/<br>Italy<br>Mixed                      | Elderly sample population<br>70.0<br>70.5<br>92.8                      | 187  | Plasma Multiplex beads                      | TLR1 – AA/GG (66-76)<br>≈90 ± 60*<br>(44.4%)          | (all) TLR1 + AG+GG/TG+TT (88-89)<br>≈80 ± 70*<br>(87.5%) |                               | (NS)<br>-10               |
| [153] | CAT/<br>rs769214              | Glucose homeostasis; malnutrition                                              | France<br>Mixed                                 | Malnourished elderly<br>83.3 ± 6.8                                     | 33   | Serum Bio-Plex                              | GG (8)<br>6.9 ± 6.8 (98.6%)                           | GA (17)<br>3.7 ± 0.8 (21.6%)                             | AA (8)<br>3.0 ± 1.1 (36.7%)   | (p<0.001)<br>-3.2<br>-3.9 |
| [154] | TGFB/<br>rs1800471            | Fibrosis; heart failure                                                        | Poland<br>Mixed                                 | Heart failure patients<br>63.0 ± 11.0                                  | 110  | Serum ELISA                                 | CC (88)<br>21 (10 - 31) <sup>‡</sup><br>(ND)          | CG (22)<br>14 (2.9 - 21.0) <sup>‡</sup><br>(ND)          | NR                            | (p=0.042)<br>-7           |
| [137] | IL6/<br>-174 G/C              | Adiposity, inflammation and metabolic disturbances                             | Brazil<br>Mixed                                 | High cardio-metabolic risk (pre-diabetes, MetS)<br>56.5 ± 11.6         | 138  | Plasma Immuno enzyme chemiluminescent assay | GG (47)<br>0.11<br>(0.09 – 0.14) <sup>‡</sup><br>(ND) | GG+CC (86)<br>0.11<br>(0.09 – 0.13) <sup>‡</sup><br>(ND) |                               | (NS)<br>NC                |
|       | ADIPOQ/<br>45 T/G             | Hypo-adiponectinemia, risk of T2DM and MetS                                    |                                                 |                                                                        |      |                                             | TT (94)<br>0.11<br>(0.09 – 0.13) <sup>‡</sup><br>(ND) | TG+GG (37)<br>0.11<br>(0.10 – 0.13) <sup>‡</sup><br>(ND) | (NS)<br>NC                    |                           |
| [155] | ZIP2/<br>A/G/T<br>rs2234632   | Severe carotid artery disease and inflammation                                 | Italy, Poland, Germany, Greece, France<br>Mixed | ZINCAGE population (healthy elderly people)<br>74.9 ± 8.5              | 1090 | Plasma Multiplex bead-based assay           | Leu – (535)<br>76.6 ± 43.9 (57.3)                     | Leu + (555)<br>70.5 ± 43.2 (61.3)                        |                               | (p=0.011)<br>-6.1         |
| [156] | TNF-LTA cluster/<br>rs2229094 | Metabolic traits including susceptibility to                                   | Canada<br>Mixed                                 | Healthy, normal                                                        | 191  | Plasma ELISA                                | TT (108)<br>≈1.9 ± 2.0 (>100%)                        | CT (66)<br>≈1.5 ± 0.5 (33.3%)                            | CC (17)<br>≈1.6 ± 0.5 (31.3%) | (NS)<br>-0.4<br>-0.3      |



|       |                         |                                   |             |                                  |      |                |                                         |                                                 |                 |                             |
|-------|-------------------------|-----------------------------------|-------------|----------------------------------|------|----------------|-----------------------------------------|-------------------------------------------------|-----------------|-----------------------------|
|       |                         | T2DM, MetS, IR, and increased BMI |             | weight, overweight<br>30.8 ± 8.7 |      |                |                                         |                                                 |                 |                             |
| [157] | TMEM182/<br>Rs141764639 | Strongly associated with WC       | Korea Mixed | Normal<br>48.5 ± 0.30            | 1314 | Serum Bio-Plex | TT (1252)<br>≈10.0 ± 35.0<br>(>100%)    | TC (62)<br>≈14.5 ± 32.0<br>(>100%) <sup>9</sup> | CC (32)<br>(NR) | ( <i>p</i> <0.05)<br>+4.5   |
|       |                         |                                   |             | Central obese<br>51.4 ± 0.42     | 827  |                | TT (749)<br>≈9.5 ± 14.0<br>(>100%)      | TC (78)<br>≈23.0 ± 26.0<br>(>100%)              | CC (39)<br>(NR) | ( <i>p</i> <0.001)<br>+13.5 |
| [158] | TLR2/<br>rs4696480      | Receptors of bacterial products.  | Spain Mixed | BMI < 30<br>49 ± 15              | 104  | Serum ELISA    | Wild type (47)<br>≈5.3 ± 2.5<br>(47.2%) | Variant (57)<br>≈4.2 ± 3.9<br>(92%)             | -               | (NS)<br>-1.1                |
|       | TLR9/<br>rs187084       |                                   |             |                                  |      |                | Wild type (65)<br>≈5.5 ± 3.8<br>(69%)   | Variant (39)<br>≈4.2 ± 4.2<br>(100%)            | -               | (NS)<br>-1.3                |
|       | TLR4/<br>rs4986790      |                                   |             |                                  |      |                | Wild type (99)<br>≈6.5 ± 3.8<br>(58.5%) | Variant (5)<br>≈4.9 ± 2.5<br>(51%)              | -               | (NS)<br>-1.6                |
|       | TLR2/<br>rs4696480      |                                   |             | BMI > 30<br>49 ± 14              | 211  |                | Wild type (89)<br>≈5.5 ± 4.7<br>(85%)   | Variant (122)<br>3.8 ± 2.7<br>(71%)             | -               | (NS)<br>-1.7                |
|       | TLR9/<br>rs187084       |                                   |             |                                  |      |                | Wild type (131)<br>≈4.2 ± 2.7<br>(64%)  | Variant (80)<br>≈4.4 ± 3.3<br>(75%)             | -               | (NS)<br>+0.2                |
|       | TLR4/<br>rs4986790      |                                   |             |                                  |      |                | Wild type (202)<br>≈4.2 ± 2.5<br>(60%)  | Variant (9)<br>≈4.4 ± 3.1<br>(70%)              | -               | (NS)<br>+0.2                |

**Legend:** <sup>a</sup>: Data are shown as the mean value ± SD unless otherwise indicated; <sup>b</sup>: Sample size of the full genotyped group; <sup>c</sup>: CV%: Coefficient of variation (%) ((CV%) = (Standard Deviation/Mean) × 100); <sup>d</sup>: Sample size of each of the genotype subgroups; <sup>e</sup>: Change (effect size) attributed to a different genotype estimated as the difference between heterozygous – homozygous reference and between homozygous variant – homozygous reference; <sup>f</sup>: median (IQR); BMI: Body mass index; IR: Insulin resistance; MetS: Metabolic syndrome; NC: No change; ND: Not determined; NR: Not reported; NS: Not significant; T2DM: Type 2 diabetes mellitus; WC: Waist circumference; ≈: Values estimated from bars figure. G: Guanine; A: Adenine; C: Cytosine; T: Thymine. Genes: *MTHFR*: Methylene tetrahydrofolate reductase; *PPARδ*: Peroxisome proliferator activated receptor delta; *VDR*: Vitamin D receptor; *CLOCK*: Clock circadian regulator.; *IL6*: Interleukin 6; *UCP3*: Uncoupling protein 3; *FTO*: FTO alpha-ketoglutarate dependent dioxygenase; *TLR*: Toll like receptor; *CAT*: Catalase; *TGFB*: Transforming growth factor; *ADIPOQ*: Adiponectin; *ZIP2*: Zinc transporter protein; *TNF-LTA*: TNF-LTA gene cluster; *LTA*: Lymphotoxin alpha; *TMEM182*: Transmembrane protein 182.

**Table S9.** Reported changes on the circulatory levels of human TNF- $\alpha$  following intervention with specific drugs in relation with obesity treatment.

|                | Intervention                                                     | Sample population |                                                                                      | TNF- $\alpha$ levels        |                                                                                                                                                                                |                                  |                                                                                                           | General message conveyed by the article                                                                                                                                                                                                                                                                                        |
|----------------|------------------------------------------------------------------|-------------------|--------------------------------------------------------------------------------------|-----------------------------|--------------------------------------------------------------------------------------------------------------------------------------------------------------------------------|----------------------------------|-----------------------------------------------------------------------------------------------------------|--------------------------------------------------------------------------------------------------------------------------------------------------------------------------------------------------------------------------------------------------------------------------------------------------------------------------------|
| Ref.           | Tested drug<br>Study design                                      | Country<br>Sex    | Body weight<br>phenotype<br>and co-<br>morbidities<br>group,<br>Age <sup>a</sup> (y) | Type of<br>Sample<br>Method | Results per group <sup>a</sup> (N) <sup>b</sup>                                                                                                                                | CV% <sup>c</sup><br>per<br>group | (Sig)<br>Effect<br>(%A <i>vs</i> B per<br>group;<br>T – C <sup>e</sup> pg/mL)                             |                                                                                                                                                                                                                                                                                                                                |
| Chemical drugs |                                                                  |                   |                                                                                      |                             |                                                                                                                                                                                |                                  |                                                                                                           |                                                                                                                                                                                                                                                                                                                                |
| [163]          | T: Orlistat (360 mg/d) + LCD<br>C: LCD<br>RCT, 365 d             | Turkey<br>Mixed   | Obese, T2DM<br>C: 53.2 $\pm$ 9.9<br>T: 53.7 $\pm$ 9.4                                | Plasma<br>ELISA             | Protein levels (pg/mL)<br>T: Orlistat + LCD (190)<br>B: NR<br>A: 13.6 (0.1 – 89.8) <sup>d</sup><br><br>C: LCD (186)<br>B: NR<br>A: 14.1 (0.3 – 96.1) <sup>d</sup><br><br>T – C | ND                               | % ND<br><br><br><br><br>-0.5 pg/mL<br>(based only on<br>values after<br>intervention)                     | Body weight reduction in both C and T groups. Association with lower levels of TNF- $\alpha$ in both groups but slightly lower in the Orlistat group than in the C subjects.<br>Insufficient information on the statistical differences between the two groups and it is not possible to ascribe any clear effect to Orlistat. |
| [164]          | T: Orlistat (NR mg/d) + LCD<br>C: LCD<br>RCT (open-label), 183 d | Greece<br>Women   | Obese<br>C: 35.4 $\pm$ 9.2<br>T: 38.0 $\pm$ 7.1                                      | Serum<br>ELISA              | Protein levels (pg/mL)<br>T: Orlistat + LCD (35)<br>B: 43 $\pm$ 15.9<br>A: 22.3 $\pm$ 7.5<br><br>C: LCD (36)<br>B: 41.1 $\pm$ 12.7<br>A: 32.5 $\pm$ 10.3<br><br>T – C          | 31%<br>32%<br><br>37%<br>34%     | ( <i>p</i> <0.001) (-48%)<br><br><br>( <i>p</i> <0.001) (-21%)<br><br>(-12.1 pg/mL)<br>( <i>p</i> <0.001) | Body weight and TNF- $\alpha$ reduction in both groups. Significant differences between T and C and thus, Orlistat potentiated the effect of a LCD in the reduction of TNF- $\alpha$ . It also potentiated the improvements in metabolic and inflammatory dysregulation.                                                       |
| [165]          | T: Orlistat (360 mg/d) + LCD<br>C: LCD<br>RCT (open-label), 60 d | Brazil<br>Women   | Obese,<br>Hypertensive<br>C: 46.8 $\pm$ 5.8<br>T: 47.9 $\pm$ 9.3                     | Serum<br>ELISA              | Protein levels (pg/mL)<br>T: Orlistat + LCD (14)<br>B: 24.5 $\pm$ 13.4<br>A: 9.7 $\pm$ 7.0                                                                                     | 55%<br>72%                       | ( <i>p</i> <0.05)<br>(-60%)                                                                               | Reduction of body weight and TNF- $\alpha$ levels in both groups, but no significant differences between T and C. Orlistat did not clearly                                                                                                                                                                                     |

|       |                                                                                                                                                       |                      |                                               |                  |                                                                                                                                                                                                                                                                                                                                      |                                                                        |                                                                                                                                                                                                    |                                                                                                                                                                                                                                                                                                                                   |
|-------|-------------------------------------------------------------------------------------------------------------------------------------------------------|----------------------|-----------------------------------------------|------------------|--------------------------------------------------------------------------------------------------------------------------------------------------------------------------------------------------------------------------------------------------------------------------------------------------------------------------------------|------------------------------------------------------------------------|----------------------------------------------------------------------------------------------------------------------------------------------------------------------------------------------------|-----------------------------------------------------------------------------------------------------------------------------------------------------------------------------------------------------------------------------------------------------------------------------------------------------------------------------------|
|       |                                                                                                                                                       |                      |                                               |                  | C: LCD (10)<br>B: 18.8 ± 7.1<br>A: 8.2 ± 1.2<br><br>T – C                                                                                                                                                                                                                                                                            | 38%<br>15%                                                             | ( <i>p</i> <0.05)<br>(-56%)<br><br>-4.2 pg/mL (NS)                                                                                                                                                 | improved the effect of a LCD on TNF- $\alpha$ and did not add any further metabolic and/or anti-inflammatory improvements.                                                                                                                                                                                                        |
| [166] | T: Orlistat (120 mg $\times$ 3/d)+ L-Carnitine (2 g/d)<br>C: Orlistat (120 mg $\times$ 3/d)<br>RCT double-blind controlled, 90 d, 180 d, 270 d, 365 d | Italy<br>Mixed       | Obese, T2DM<br>C: 53.0 ± 6.0<br>T: 51.0 ± 4.0 | Unclear<br>ELISA | Protein levels (pg/mL)<br>T: Orlistat+ L-Carnitine (132)<br>B: 4.8 ± 2.1<br>A (90 d): 4.3 ± 1.7<br>A (180 d): 3.4 ± 1.1<br>A (270 d): 3.1 ± 0.9<br>A (365 d): 2.8 ± 0.7<br><br>C: Orlistat (126)<br>B: 4.4 ± 1.8<br>A (90 d): 4.0 ± 1.5<br>A (180 d): 3.8 ± 1.3<br>A (270 d): 3.7 ± 1.2<br>A (365 d): 3.3 ± 1.0<br><br>T – C (365 d) | 44%<br>50%<br>32%<br>29%<br>25%<br><br>41%<br>40%<br>34%<br>32%<br>30% | (NS) (-10%)<br>( <i>p</i> <0.05) (-29%)<br>( <i>p</i> <0.02) (-35%)<br>( <i>p</i> <0.01) (-42%)<br><br>(NS) (-9%)<br>(NS) (-14%)<br>(NS) (-16%)<br>( <i>p</i> <0.05) (-25%)<br><br>-0.9 pg/mL (NS) | Body weight and TNF- $\alpha$ levels decreased in both groups but no significant differences between T and C for the levels of TNF- $\alpha$ . The authors claim that Orlistat + L-Carnitine led to a better improvement in body weight, metabolic profile and inflammatory parameters than Orlistat, but differences were small. |
| [167] | T: Sibutramine (10 mg/d) + LCD (+ exercise)<br>C: No control group<br>60 d                                                                            | South Korea<br>Mixed | Obese<br>T: LCD + Sibutramine:<br>38.5 ± 11.8 | Serum<br>ELISA   | Protein levels (pg/mL)<br>T: Sibutramine + LCD (+ exercise) (78)<br>B: 2.94 ± 0.9<br>A: 2.48 ± 0.7<br><br>C: NR<br><br>T – C                                                                                                                                                                                                         | 31%<br>27%                                                             | ( <i>p</i> <0.001)<br>(-16%)<br><br>ND<br><br>ND                                                                                                                                                   | Body weight loss upon caloric restriction + Sibutramine (+ exercise) was accompanied by a reduction of TNF- $\alpha$ and improve metabolic risk factors. Since there wasn't a C group, it was not possible to differentiate the LCD effect from the drug effect.                                                                  |
| [168] | T1: Sibutramine (10 mg/d)<br>T2: Sibutramine (15 mg/d)<br>RCT (prospective open),<br>570 d                                                            | Turkey<br>Women      | Obese<br>T1: 39.6 ± 2.1<br>T2: 40.6 ± 8.1     | Plasma<br>ELISA  | Protein levels (pg/mL)<br>T1: Sibutramine 10 mg/d (30)<br>B: 3.0 ± 1.1<br>A: 2.5 ± 1.09<br><br>T2: Sibutramine 15 mg/d (30)<br>B: 3.4 ± 1.5                                                                                                                                                                                          | 37%<br>43.6%<br><br>44%<br>29%                                         | ( <i>p</i> <0.04)<br>(-17%,)<br><br>( <i>p</i> <0.001)<br>(-30%)                                                                                                                                   | The two doses of Sibutramine reduced body weight and TNF- $\alpha$ levels but no information on significant differences between groups.                                                                                                                                                                                           |

|       |                                                                                                                      |                          |                                                                                    |                 |                                                                                                                                                                                                                                                                                                                                                                                           |                                                                        |                                                                                                                                                          |                                                                                                                                                                                                                                    |
|-------|----------------------------------------------------------------------------------------------------------------------|--------------------------|------------------------------------------------------------------------------------|-----------------|-------------------------------------------------------------------------------------------------------------------------------------------------------------------------------------------------------------------------------------------------------------------------------------------------------------------------------------------------------------------------------------------|------------------------------------------------------------------------|----------------------------------------------------------------------------------------------------------------------------------------------------------|------------------------------------------------------------------------------------------------------------------------------------------------------------------------------------------------------------------------------------|
|       |                                                                                                                      |                          |                                                                                    |                 | A: $2.4 \pm 0.7$<br>T2 – T1                                                                                                                                                                                                                                                                                                                                                               |                                                                        | -0.5 pg/mL (NR)                                                                                                                                          | It is not addressed if this effect is associated with body weight reduction.                                                                                                                                                       |
| [169] | T: Sibutramine (10 mg/d) + LCD (+ exercise)<br>C: LCD (+ exercise)<br>RCT, 365 d                                     | Italy<br>Mixed           | Obese, T2DM<br>C: $53.0 \pm 6.0$<br>T: $51.0 \pm 4.0$                              | Serum<br>NR     | Protein levels (pg/mL)<br>T: Sibutramine + LCD + exercise (110)<br>B: $4.9 \pm 2.2$<br>A (90 d): $4.3 \pm 1.7$<br>A (183 d): $4.2 \pm 1.6$<br>A (270 d): $3.7 \pm 1.3$<br>A (365 d): $3.2 \pm 1.1$<br><br>C: LCD + exercise (112)<br>B= $4.5 \pm 1.9$<br>A (90 d): $4.4 \pm 1.8$<br>A (183 d): $4.3 \pm 1.7$<br>A (270 d): $4.1 \pm 1.5$<br>A (365 d): $3.8 \pm 1.4$<br><br>T – C (365 d) | 45%<br>40%<br>38%<br>35%<br>34%<br><br>42%<br>41%<br>40%<br>37%<br>37% | (NS) (-12%)<br>(NS) (-14%)<br>(p<0.05) (-25%)<br>(p<0.01) (-35%)<br><br>(NS) (-2%)<br>(NS) (-4%)<br>(NS) (-9%)<br>(p<0.05) (-16%)<br><br>-1.0 pg/mL (NS) | Body weight reduction more significant in the Sibutramine group.<br>TNF- $\alpha$ levels significantly reduced in both the T and the C groups.<br>TNF- $\alpha$ significant predictor of BMI changes.                              |
| [170] | T: Diacerein + LCD + Sibutramine (+ exercise)<br>C: LCD + Sibutramine (+ exercise) (doses not reported)<br>RCT, 84 d | South Korea<br>Mixed     | Obese, T2DM, Hypertensive, Dyslipidaemia<br>T: $39.0 \pm 1.0$<br>C: $37.0 \pm 1.0$ | NR<br>EIA       | Protein levels (pg/mL)<br>T: Diacerein + Sibutramine + LCD (12)<br>B: $15.7 \pm 1.4$<br>A: $10.3 \pm \text{NR}$<br><br>C: Sibutramine + LCD (7)<br>B: $11.5 \pm 2.7$<br>A: $5.3 \pm \text{NR}$<br><br>T – C                                                                                                                                                                               | 9%<br>ND<br><br>23%<br>ND                                              | (NS) (-34%)<br><br>(NS) (-54%)<br><br>+0.8 pg/mL (NS)                                                                                                    | Body weight and TNF- $\alpha$ levels reduction in both groups but no significant differences between them.<br>Diacerein (anti-IL-1 drug), given on top of Sibutramine, did not produce additional weight or metabolic improvement. |
| [29]  | T: Troglitazone (2x200 mg/d)<br>C: PLA<br>RCT (double-blind crossover, ), 56 d                                       | The Netherlands<br>Mixed | Obese<br>$37.4 \pm 1.2$                                                            | Plasma<br>ELISA | Protein levels (pg/mL)<br>Participants (126)<br>T: Troglitazone<br>A: $3.4 \pm 0.5$                                                                                                                                                                                                                                                                                                       | 15%                                                                    | ND                                                                                                                                                       | No changes observed for body weight.<br>Lower levels of TNF- $\alpha$ in obese participants treated with troglitazone as compare to PLA                                                                                            |

|       |                                                                                                                                                                                       |                |                                                                      |                              |                                                                                                                                                                                                                                                     |                                            |                                                                                             |                                                                                                                                 |
|-------|---------------------------------------------------------------------------------------------------------------------------------------------------------------------------------------|----------------|----------------------------------------------------------------------|------------------------------|-----------------------------------------------------------------------------------------------------------------------------------------------------------------------------------------------------------------------------------------------------|--------------------------------------------|---------------------------------------------------------------------------------------------|---------------------------------------------------------------------------------------------------------------------------------|
|       |                                                                                                                                                                                       |                |                                                                      |                              | C: PLA<br>A: $4.5 \pm 0.5$<br><br>T – C                                                                                                                                                                                                             | 11%                                        | ND<br><br>-1.1 pg/mL<br>(based only on values after intervention)                           | (↓ -24%, $p < 0.01$ ) but there is no information on baseline values.                                                           |
| [171] | T: Rosiglitazone ± MET (8 mg/d + 1500 ± 500 mg/d) (controlled energy diet)<br>C: MET (2500 ± 500 mg/d) (controlled energy diet)<br>RCT (single-blind placebo-controlled), 90 d, 180 d | Italy<br>Mixed | Overweight/<br>Obese, T2DM<br>C: $54.0 \pm 3.0$<br>T: $55.0 \pm 4.0$ | Plasma<br>ELISA              | Protein levels (ng/mL)<br>T: Rosiglitazone + MET (56)<br>B: $3.2 \pm 0.6$<br>A (90 d): $2.8 \pm 0.5$<br>A (180 d): $2.5 \pm 0.4$<br><br>C: MET (61)<br>B: $3.5 \pm 0.9$<br>A (90 d): $3.3 \pm 0.8$<br>A (180 d): $3.2 \pm 0.7$<br><br>T – C (180 d) | 19%<br>18%<br>16%<br><br>26%<br>24%<br>22% | (NS) (-13%)<br>( $p < 0.05$ ) (-22%)<br><br>(NS) (-6%)<br>(NS) (-9%)<br><br>-0.4 pg/mL (NS) | There was no body weight reduction in any group. No significant differences reported between groups for TNF- $\alpha$ levels.   |
| [172] | T: HCQ (400 mg/d)<br>C: PLA<br>RCT double-blind, parallel-arm, 93 d                                                                                                                   | USA<br>Mixed   | Overweight/<br>Obese,<br>IR non-diabetic patients (> 18.0)           | NR<br>ELISA                  | Protein levels (pg/mL)<br>T: HCQ (13)<br>B: NR, A: NR<br><br>C: PLA (15)<br>B: NR, A: NR<br><br>T – C                                                                                                                                               | ND                                         | No effect<br><br>ND                                                                         | There were no significant changes in body weight or any other inflammatory cytokine except for adiponectin. No values reported. |
| [173] | T: Rimonabant (20 mg/d)<br>C: MET (500 mg 3x/d)<br>RCT (open labelled parallel), 84 d                                                                                                 | UK<br>Women    | Obese, PCOS<br>NR                                                    | Serum<br>Bio-Plex 200 system | Protein levels (pg/mL)<br>T: Rimonabant (10)<br>B: $8.7 \pm 3.9$<br>A: $8.7 \pm 3.7$<br><br>C: MET (10)<br>B: $7.1 \pm 2.9$<br>A: $7.9 \pm 4.3$<br><br>T – C                                                                                        | 45%<br>45%<br><br>41%<br>54%               | (NS) No change<br><br>(NS) (+11%)<br><br>-0.8 pg/mL (NS)                                    | Significant reduction of body weight with Rimonabant but, no effects on TNF- $\alpha$ levels in any group.                      |

|                       |                                                                                                                                                                                                        |                  |                                                                                  |                |                                                                                                                                                                                      |                                              |                                                                                                 |                                                                                                                                                                                                                                 |
|-----------------------|--------------------------------------------------------------------------------------------------------------------------------------------------------------------------------------------------------|------------------|----------------------------------------------------------------------------------|----------------|--------------------------------------------------------------------------------------------------------------------------------------------------------------------------------------|----------------------------------------------|-------------------------------------------------------------------------------------------------|---------------------------------------------------------------------------------------------------------------------------------------------------------------------------------------------------------------------------------|
| [174]                 | T: Combined Lacidipine (2 and 4 mg) + Candesartan (4, 8, 16 mg)<br>Not a RCT, 56 d                                                                                                                     | Ukraine<br>Mixed | Overweight/<br>Obese,<br>Hypertensive<br>T: 54.7 ± 5.8                           | Serum<br>ELISA | Protein levels (pg/mL)<br>T: combined drugs (30)<br>B: 132.6 ± 22.6<br>A: 44.9 ± 5.6<br><br>C: NR<br><br>T – C                                                                       | 17%<br>13%                                   | ( <i>p</i> <0.05)<br>(-66%)<br><br>ND<br><br>ND                                                 | It does not indicate results for a control group neither on body weight changes.                                                                                                                                                |
| [175]                 | T: MET (dose1:1000, dose2: 2000, dose3: 3000 mg/d)<br>Cross-sectional study                                                                                                                            | Ghana<br>Mixed   | Mostly<br>overweight,<br>T2DM<br>responsive to<br>MET<br>T: 61 to 80 y           | Serum<br>ELISA | Protein levels (pg/mL)<br>dose1: 125.0 ± 61.0<br>dose2: 95.0 ± 57.0<br>dose3: 60.0 ± 63.0<br><br>dose3 – dose1                                                                       | 49%<br>60%<br>>100%                          | ( <i>p</i> <0.0001)<br>(-52%)<br>(dose3 <i>vs</i> dose1)<br><br>-65 pg/mL<br>( <i>p</i> <0.001) | A significant reduction of TNF- $\alpha$ levels with a higher dose. Not an intervention study or clinical trial. No control group.                                                                                              |
| Protein/peptide drugs |                                                                                                                                                                                                        |                  |                                                                                  |                |                                                                                                                                                                                      |                                              |                                                                                                 |                                                                                                                                                                                                                                 |
| [176]                 | T: Etanercept (50 mg $\times$ 2 weekly for 90 d, then 50 mg $\times$ 1 weekly for 90 d); TNF- $\alpha$ inhibitor<br>C: PLA<br>RCT, 180 d                                                               | USA<br>Mixed     | Obese<br>T: 41.0 ± 2.0<br>C: 47.0 ± 2.0                                          | Serum<br>ELISA | Protein levels (pg/mL)<br>T: Etanercept (12)<br>B: 3.4 ± 6.2<br>A (90 d): NR<br>A (180 d): NR<br><br>C: PLA (22)<br>B: 0.9 ± 2.3<br>A (90 d): NR<br>A (180 d): NR<br><br>T – C       | >100%<br><br><br><br><br><br>>100%           | (NS) (+55%)<br><br><br><br><br><br>( <i>p</i> <0.03) (+51%)<br><br>ND                           | The levels of TNF- $\alpha$ were increased in both the T and C groups but no values after treatment reported. No effects on body weight. No significant correlation between BMI and TNF- $\alpha$ expression in adipose tissue. |
| [177]                 | T: Exenatide (5.0 $\mu$ g s.c.i. + 0.5 g MET $\times$ 2/d for 28 d, then 10.0 $\mu$ g s.c.i. + 0.5 g MET $\times$ 2/d for 168 d: GLP-1<br>C: No control group included, comparison women <i>vs</i> men | China<br>Mixed   | Overweight/<br>Obese,<br>T2DM<br>Females:<br>49.1 ± 10.4<br>Males:<br>48.4 ± 9.8 | Serum<br>ELISA | Protein levels (pg/mL)<br>Women<br>T: Exenatide (+ MET) (54)<br>B: 34.6 ± 85.2<br>A (196 d): 28.0 ± 89.0<br><br>Men<br>T: Exenatide (+ MET) (51)<br>B: 33.5 ± 70.0<br>A: 30.3 ± 85.6 | >100%<br>>100%<br><br><br><br>>100%<br>>100% | ( <i>p</i> =0.001)<br>(-19%)<br><br><br><br>( <i>p</i> =0.039)<br>(-10%)                        | Reduction of body weight and TNF- $\alpha$ levels in both groups but significantly better in women than in men.                                                                                                                 |

|       |                                                                                                                                                                                              |                  |                                                                                 |                 |                                                                                                                                                                             |                              |                                                                 |                                                                                                                                                                                                                                                                                   |
|-------|----------------------------------------------------------------------------------------------------------------------------------------------------------------------------------------------|------------------|---------------------------------------------------------------------------------|-----------------|-----------------------------------------------------------------------------------------------------------------------------------------------------------------------------|------------------------------|-----------------------------------------------------------------|-----------------------------------------------------------------------------------------------------------------------------------------------------------------------------------------------------------------------------------------------------------------------------------|
|       |                                                                                                                                                                                              |                  |                                                                                 |                 | T - C                                                                                                                                                                       |                              | ND                                                              |                                                                                                                                                                                                                                                                                   |
| [178] | T: Exenatide (5.0 µg s.c.i. + 0.5 g MET x2/d for 30 d, then 10.0 µg s.c.i. + 0.5 g MET x2/d for 90 d: GLP-1<br>C: Acarbose 50-100 mg oral + 0.5 g MET 90 d)<br>RCT (prospective open), 120 d | China<br>Mixed   | Obese, T2DM<br>T: 44.4 ± 11.1<br>C: 38.7 ± 10.3                                 | NR<br>NR        | Protein levels (pg/mL)<br>T: Exenatide (+ MET) (15)<br>B: 25.1 ± 10.7<br>A: 18.1 ± 6.8<br><br>C: Acarbose (+ MET) (16)<br>B: 23.2 ± 10.4<br>A: 22.2 ± 8.0<br><br>T - C      | 43%<br>38%<br><br>45%<br>36% | (p<0.001)<br>(-28%)<br><br>(NS)<br>(-4%)<br><br>-6.0 pg/mL (NS) | Exenatide/MET reduced significantly intra-abdominal fat content in comparison with the C group.<br>BMI is reduced in both groups. TNF-α levels significantly reduced with T but difference between the T and C group did not reach significance.                                  |
| [179] | T: Liraglutide (s. c. i. x1/d from 0.6 mg to 1.8 mg within 28 d) + MET (orally from 0.5 g x2/d to 1 g x2/d within 28 d); GLP-1<br>C: PLA + MET<br>RCT (double-blind cross-over), 84 d        | Denmark<br>Mixed | Overweight/<br>Obese, CAD,<br>T2DM on<br>stable statin<br>therapy<br>62.3 ± 7.6 | Plasma<br>ELISA | Protein levels (pg/mL)<br>Patients (28)<br>T: Liraglutide<br>B: 6.1 (5.3, 7.0) <sup>d</sup><br>A: NR<br><br>C: PLA + MET<br>B: NR<br>A: NR<br>-0.2 (-0.6, 0.2)<br><br>T - C | ND<br><br>ND                 | No effect<br><br>(p<0.05)<br>ND<br><br>ND                       | No significant different results between groups. Lack of data and unclear results but apparent lack of effect of the drug liraglutide on TNF-α levels.<br>No clear information on body weight changes but the authors claim no correlation between TNF-α and body weight changes. |

**Legend:** <sup>a</sup>: Results are presented as the mean ± SD unless otherwise stated; <sup>b</sup>: N: group sample size; <sup>c</sup>: CV%: Coefficient of variation ((CV%) = (Standard Deviation/Mean) × 100); <sup>d</sup>: median (IQR); <sup>e</sup>: calculated as ΔT - ΔC; Δ= A - B unless otherwise indicated; A: After treatment; B: Before treatment; C: Control group; CAD: Coronary Artery Disease; d: day; EIA: Enzyme immune assay; GLP-1: Glucagon-like peptide 1; HCQ: Hydroxychloroquine (anti-malarial drug with anti-inflammatory properties); IR: Insulin resistance; LCD: Low Calorie Diet; MET: Metformin; ND: Not determined; NR: Not reported; NS: Not significant; PLA: Placebo; PCOS: Polycystic ovary syndrome; RCT: Randomized controlled trial; SAT: Subcutaneous abdominal adipose tissue; s.c.i.: subcutaneous injection; T: Treatment group; T2DM: Type 2 Diabetes Mellitus; TNF-α: Tumour necrosis factor alpha.
